# Supplementary material for: Evaluating Performance of Rigid and Flexible Docking Strategies for BACE1 Complexes: A Comparative Study of Physics-based and AI-Driven Docking Methods
Source: Research Square preprint supplement (doi:10.21203/rs.3.rs-7778725/v1), 2025-11-18
Supplement: Supplementary file 1 [file 114208f4cd8bc4401af2a7e8.docx]

**Evaluating Performance of Rigid and Flexible Docking Strategies for BACE1 Complexes: A Comparative Study of Physics-based and AI-Driven Docking Methods**

Kapali Suri1, Anshul Yadav1, Abhishek Tripathi1, N. Arul Murugan1,2

1Department of Computational Biology, Indraprastha Institute of Information Technology, Okhla Industrial Estate, Delhi-110020, India

2Centre for Excellence in Healthcare, Indraprastha Institute of Information Technology, Okhla Industrial Estate, Delhi-110020, India

**Script 1. Python code to programmatically retrieve all PDB structures of BACE1 (UniProt ID: P56817) from RCSB PDB and store them locally.**

**import os**

**import requests**

**import json**

**def get_pdb_ids(uniprot_id):**

**api_url = f'https://www.ebi.ac.uk/proteins/api/proteins/{uniprot_id}?offset=0&size=1'**

**response = requests.get(api_url, headers={"Accept": "application/json"})**

**if response.status_code == 200:**

**data = response.json()**

**db_references = data.get('dbReferences', [])**

**pdb_ids = [entry['id'] for entry in db_references if entry['type'] == 'PDB']**

**return pdb_ids**

**else:**

**print(f"Failed to retrieve PDB IDs for UniProt ID {uniprot_id}. Status code: {response.status_code}")**

**return []**

**def download_pdb(pdb_id, destination_folder):**

**pdb_url = f"https://files.rcsb.org/download/{pdb_id}.pdb"**

**response = requests.get(pdb_url)**

**if response.status_code == 200:**

**if not os.path.exists(destination_folder):**

**os.makedirs(destination_folder)**

**destination_file = os.path.join(destination_folder, f"{pdb_id}.pdb")**

**with open(destination_file, 'wb') as f:**

**f.write(response.content)**

**print(f"File downloaded successfully to {destination_file}")**

**else:**

**print(f"Failed to download PDB file {pdb_id}. Status code: {response.status_code}")**

**# UniProt ID for downloading PDB IDs**

**uniprot_id = "P56817"**

**# Get PDB IDs associated with the UniProt ID**

**pdb_ids = get_pdb_ids(uniprot_id)**

**# Create a single destination folder**

**destination_folder = os.path.join("PDB_Files")**

**# Download each PDB file and store in the destination folder**

**for pdb_id in pdb_ids:**

**download_pdb(pdb_id, destination_folder)**

**Methods used for calculating RMSD:**

RMSD values reported in this study were computed with a tool- and pose-specific workflow that ensures the same ligand atoms are compared even when the underlying docking programs use different internal atom-ordering conventions or symmetry representations.

**AutoDock 4 / AutoDock Vina**

These two programs preserve the order of the ligand atoms that appear in the input PDBQT file. Therefore, a straightforward, coordinate-based RMSD was sufficient.

**DOCK 6**

DOCK 6 already returns a symmetry-corrected heavy-atom RMSD in its output file. The reported value corresponds to the Hungarian algorithm–based metric HA_RMSDh.

**GNINA / DiffDock**

GNINA and DiffDock can reorder the ligand atoms internally. To obtain a consistent RMSD, we used DockRMSD , which recursively enumerates all valid atomic mappings derived from the bonding graph of the ligand and returns the lowest RMSD among them.

**Table S1: Root Mean Square Deviation (RMSD) values of the lowest-energy docking poses**

|  | PDB ID | AutoDock Vina Rigid | AutoDock Rigid | DOCK 6 Rigid | GNINA Rigid | AutoDock Vina Flexible | AutoDock Flexible | DOCK 6 Flexible | GNINA Flexible | DiffDock |
| --- | --- | --- | --- | --- | --- | --- | --- | --- | --- | --- |
| 0 | 4D85 | 0.38 | 0.84 | 0.1 | 0.26 | 6.63 | 9.72 | 0.35 | 4.7 | 16.07 |
| 1 | 5QD8 | 0.5 | 2.22 | 0.25 | 0.23 | 9.27 | 8.35 | 0.24 | 11.04 | 13.77 |
| 2 | 2NTR | 6.52 | 11.24 | 0.22 | 4.77 | 8.77 | 7.67 | 0.61 | 4.52 | 14.78 |
| 3 | 2VA7 | 7.4 | 5.95 | 4.18 | 5.53 | 5.25 | 1.96 | 3.95 | 6 | 21.9 |
| 4 | 6EJ2 | 0.93 | 0.95 | 0.95 | 0.68 | 7.82 | 7.78 | 4.39 | 8.02 | 12.67 |
| 5 | 4B1C | 2.13 | 9.58 | 0.39 | 1.68 | 7.51 | 7.14 | 0.8 |  | 12.25 |
| 6 | 5KR8 | 1.02 | 6.11 | 0.68 | 1.44 | 2.36 | 4.55 | 0.79 | 2.2 | 19.05 |
| 7 | 4IVT | 3.08 | 8.33 | 3.59 | 2.81 | 8.08 | 7.62 | 5.53 | 3 | 14.81 |
| 8 | 4X2L | 3.24 | 3.18 | 1.13 | 0.64 | 0.92 | 1.83 | 2.77 | 1.78 | 15.58 |
| 9 | 5HDV | 0.51 | 0.79 | 1.42 | 0.27 | 8.36 | 1.44 | 0.37 |  | 6.59 |
| 10 | 3VV8 | 6.5 | 7.32 | 0.9 | 3.52 | 7.49 | 6.57 | 1.07 | 1.88 | 13.01 |
| 11 | 2ZE1 | 10.37 | 3.07 | 5.89 | 11.52 | 3.94 | 10.22 | 1.38 | 10.03 | 18.63 |
| 12 | 2Q15 | 6.48 | 8.08 | 0.35 | 6.86 | 7.17 | 5.06 | 3.18 | 7.77 | 12.69 |
| 13 | 3DM6 | 9.23 | 18.01 |  |  | 11.16 | 2.38 |  |  |  |
| 14 | 6FGY | 7.69 | 7.05 | 0.48 | 12.58 | 6.55 | 5.6 | 0.32 | 12.78 | 12.95 |
| 15 | 6C2I | 8.65 | 10.19 | 0.22 | 7.77 | 8.82 | 1.88 | 0.31 | 6.24 | 18.78 |
| 16 | 3IN3 | 1.15 | 1.66 | 0.27 | 1.32 | 7.24 | 0.49 | 0.81 | 6.7 | 14.24 |
| 17 | 4DUS | 0.9 | 1.8 | 0.29 | 0.77 | 6.52 | 9.2 | 0.85 |  | 13.15 |
| 18 | 5I3X | 9.24 | 7 | 0.54 | 1.31 | 7.34 | 5.09 | 5.93 | 2.9 | 17.3 |
| 19 | 4FM7 | 0.37 | 0.7 | 0.36 | 0.36 | 7.36 | 6.46 | 0.4 | 4.1 | 18.43 |
| 20 | 5QD7 | 11.72 | 1 | 0.18 | 0.75 | 6.85 | 9.72 | 0.51 | 13.4 | 11.82 |
| 21 | 4L7G | 4.63 | 5.1 | 8.13 | 1.08 | 6.81 | 2.48 | 8.57 | 1.45 | 18.93 |
| 22 | 4J1K | 8.29 | 7.63 | 0.25 | 5.42 | 7.91 | 5.71 | 0.53 | 10.31 | 8.48 |
| 23 | 4J17 | 7.51 | 7.76 | 1.9 | 5.91 | 7.92 | 7.49 | 1.96 | 13.03 | 11.67 |
| 24 | 5QD5 | 10.81 | 2.98 | 0.36 | 0.26 | 5.3 | 8.54 | 0.65 | 13.96 | 13.85 |
| 25 | 5HTZ | 0.28 | 0.4 | 0.25 | 7.02 | 6.84 | 2.4 | 0.15 | 4.27 | 16.15 |
| 26 | 3K5C | 11.87 | 0.48 | 0.11 | 0.5 | 3.3 | 9.07 | 0.46 |  | 19.43 |
| 27 | 2WEZ | 1.47 | 9.98 | 0.2 | 1.82 | 9.94 | 8.66 | 0.8 | 11.08 | 17.39 |
| 28 | 2PH8 | 0.85 | 0.34 | 0.2 | 0.31 | 6.69 | 4.87 | 0.52 | 13.64 | 17.9 |
| 29 | 4ZSR | 7.99 | 8.06 | 0.17 | 8.05 | 7.86 | 7.44 | 0.68 |  | 15.72 |
| 30 | 3INH | 0.9 | 1.46 | 0.39 | 0.79 | 6.22 | 3.02 | 0.84 | 6.26 | 13.78 |
| 31 | 5HE5 | 0.75 | 2.55 | 4.64 | 0.66 | 5.31 | 2.12 | 5.07 |  | 8.51 |
| 32 | 2OHR | 1.64 | 8.28 | 6.3 | 1.82 | 5.49 | 2.75 | 22.33 | 1.85 | 8.11 |
| 33 | 4B1E | 5.75 | 7.34 | 3.19 | 4.27 | 4.77 | 5.03 | 5.39 |  | 14.51 |
| 34 | 3FKT | 0.5 | 1.34 | 1.89 | 1.15 | 8.58 | 4.86 | 2.63 | 6.14 | 16.96 |
| 35 | 3MSJ | 4.88 | 6.31 | 6.02 | 6.05 | 5.89 | 5.84 | 5.47 | 5.75 | 12.59 |
| 36 | 4RCF | 0.38 | 0.47 | 0.56 | 0.37 | 8.57 | 8.55 | 0.81 | 8.58 | 14.74 |
| 37 | 4I10 | 5.92 | 5.37 | 0.53 | 7.3 | 6.79 | 6.04 | 1.96 | 4.65 | 20.3 |
| 38 | 2ZDZ | 4.23 | 2.06 | 0.42 | 9.29 | 3.82 | 4.02 | 1.11 | 9.41 | 17.97 |
| 39 | 4ZPG | 0.24 | 1.17 | 0.22 | 0.28 | 4.67 | 2.26 | 7.73 | 2.18 | 13.22 |
| 40 | 3KYR | 7.71 | 8.03 | 16.2 | 7.81 | 10.57 | 9.65 | 32.38 | 4.79 | 18.89 |
| 41 | 5QD3 | 1 | 3.06 | 0.67 | 2.79 | 3.46 | 4.61 | 1.56 |  | 13.17 |
| 42 | 4FCO | 13.25 | 12.97 |  | 13.21 | 9.78 | 10.61 | 2.81 | 12.87 | 16.74 |
| 43 | 3HVG | 2.51 | 0.61 | 1.08 | 1.19 | 4.92 | 2.47 | 0.61 | 5.73 | 4.07 |
| 44 | 5HDZ | 3.7 | 3.12 | 0.09 | 2.68 | 8.77 | 1.97 |  |  | 15.84 |
| 45 | 5CLM | 7.76 | 7.26 | 0.98 | 9.99 | 6.55 | 5.65 | 0.77 | 5.97 | 6.9 |
| 46 | 7MYI | 1.53 | 7.24 | 7.67 |  | 3.02 | 6.16 |  |  |  |
| 47 | 2HIZ | 2.6 | 10.88 | 0.4 | 5.07 | 9.09 | 5.35 | 2.13 | 2.53 | 13.33 |
| 48 | 4WY1 | 5.98 | 7.88 | 4.62 | 1.56 | 5.26 | 6 | 4.72 | 4.45 | 14.5 |
| 49 | 2WF3 | 7.03 | 2.34 | 0.38 | 1.69 | 9.29 | 8.94 | 0.45 | 10.06 | 6.08 |
| 50 | 2ZJN | 0.96 | 7.33 | 6.16 | 1.18 | 9.99 | 8.8 | 0.41 | 5.74 | 8.7 |
| 51 | 6JSF | 3.87 | 8.72 | 0.1 | 5.35 | 9.11 | 8.14 | 0.16 | 6.13 | 11.78 |
| 52 | 2ZJM | 1.28 | 6.93 | 0.41 | 1.14 | 4.64 | 9.97 | 0.88 | 2.33 | 9.39 |
| 53 | 3IXJ | 7.57 | 11.09 |  | 6.15 | 6.47 | 7.84 | 1.41 | 5.12 |  |
| 54 | 4FSE | 5.35 | 6.17 | 0.18 | 5.79 | 7.78 | 8.74 | 6.74 | 5.58 | 20.51 |
| 55 | 6JT4 | 8.28 | 7.46 | 0.53 | 8.72 | 10.14 | 6.88 | 0.76 | 12.05 | 11.22 |
| 56 | 4J0P | 7.28 | 8.97 | 0.14 | 5.56 | 6.4 | 7.34 | 0.33 | 6.98 | 8.29 |
| 57 | 5DQC | 7.8 | 9.72 | 0.16 | 10.45 | 5.85 | 6.69 | 0.52 | 12.73 | 16.51 |
| 58 | 2QMD | 9.86 | 11.72 | 0.22 | 0.59 | 6.91 | 8.79 | 0.26 |  | 7.2 |
| 59 | 2OF0 | 5.74 | 5.36 | 0.53 | 3.04 | 6.62 | 2.87 | 20.32 | 2.26 | 16.26 |
| 60 | 4I11 | 3.6 | 10.86 | 0.21 | 1.27 | 4.39 | 3.25 | 0.53 | 7.05 | 7.61 |
| 61 | 7DCZ | 7.73 | 8.49 | 0.75 | 8.13 | 8.08 | 7.35 | 1.52 | 10.08 | 7.09 |
| 62 | 7D5A | 3.25 | 6.85 | 0.31 | 3.28 | 9.21 | 8.59 | 0.27 | 10 | 12.5 |
| 63 | 2OHN | 1.35 | 1.34 | 0.51 | 0.41 | 6 | 4.94 | 0.45 | 1.5 |  |
| 64 | 2WF0 | 2.28 | 12.03 | 25.98 | 0.62 | 6.41 | 8.35 | 0.62 | 10.18 | 18.87 |
| 65 | 4B72 | 6.9 | 6.74 | 1.17 | 0.38 | 6.81 | 6.42 | 2.45 | 7.71 | 14.39 |
| 66 | 3LNK | 2.22 | 11.16 | 0.51 | 1.82 | 9.22 | 5.97 | 1.63 |  | 22.28 |
| 67 | 4L7H | 3.28 | 9.3 | 26.58 |  | 6.8 | 6.93 |  |  | 14.92 |
| 68 | 3L5B | 5.86 | 9.25 | 6.29 | 5.21 | 5.7 | 2.47 | 17.99 | 5.73 | 16.35 |
| 69 | 3IXK | 3.29 | 10.49 |  | 5.86 | 6.65 | 5.27 | 3.64 | 12.91 |  |
| 70 | 3UDM | 3.91 | 0.91 | 0.54 | 0.38 | 6.06 | 8 | 3.09 | 3.84 | 15.4 |
| 71 | 4EXG | 1.21 | 7.6 | 0.14 | 0.69 | 8.41 | 8.7 | 0.51 | 8.98 | 13.57 |
| 72 | 2P83 | 10.09 | 10.58 | 0.45 | 2.61 | 8.93 | 10.44 | 3.44 | 4.09 | 9.16 |
| 73 | 4D8C | 0.97 | 4.02 | 0.26 | 10.52 | 6.65 | 5.46 | 0.68 | 7.35 | 10.66 |
| 74 | 3UDK | 0.51 | 2.97 | 0.25 | 1.11 | 3.38 | 2.77 | 0.47 | 2.41 | 15.47 |
| 75 | 3IVH | 1.64 | 8.85 | 0.2 | 0.83 | 5.21 | 9.3 | 0.22 | 3.25 | 13.38 |
| 76 | 3OHF | 2.89 | 11.4 | 0.26 | 1.61 | 5.29 | 5.42 | 27.37 |  | 11.96 |
| 77 | 4H1E | 0.94 | 1.1 | 6.57 | 0.42 | 10.09 | 3.33 | 1.14 | 2.59 | 18.88 |
| 78 | 3S7L | 1.46 | 1.78 | 7.14 | 1.4 | 7.54 | 1.47 | 4.49 | 7.15 | 8.19 |
| 79 | 4J1H | 8.22 | 7.43 | 1.63 | 10.69 | 9.19 | 6.09 | 0.89 | 6.99 | 12.82 |
| 80 | 3L58 | 9.63 | 8.67 | 0.37 | 1.59 | 6.19 | 6.92 | 1.38 | 4.07 | 19.86 |
| 81 | 4KE0 | 2.99 | 3.86 | 0.2 | 0.21 | 8.62 | 8.65 | 0.2 |  | 13.72 |
| 82 | 4IVS | 8.49 | 5.76 | 3.99 | 5.58 | 8.64 | 3.29 | 1.97 | 4.08 | 11.73 |
| 83 | 3LPK | 0.66 | 10.27 | 0.21 | 0.52 | 6.29 | 6.05 | 3.34 | 10.05 | 18.4 |
| 84 | 6OD6 | 7.47 | 9.76 | 1.26 | 8.63 | 8.61 | 8.07 | 0.81 | 7.21 | 11.59 |
| 85 | 5V0N | 0.86 | 6.62 | 0.31 | 11.22 | 6.69 | 8.67 | 1.78 |  | 13 |
| 86 | 4FS4 | 6.85 | 0.65 | 0.26 | 8.96 | 6.86 | 0.63 | 0.54 | 0.89 | 14.75 |
| 87 | 5MXD | 9.61 | 10.8 | 9.94 | 8.68 | 5.66 | 6.33 | 9.61 | 7.6 | 16.15 |
| 88 | 4YBI | 0.51 | 9.43 | 0.2 | 0.37 | 5.92 | 1.78 | 0.64 | 0.73 | 22.75 |
| 89 | 3BRA | 8.69 | 2.96 | 9.07 | 2.99 | 6.16 | 4.01 | 16.61 | 1.23 | 23.34 |
| 90 | 4JPE | 6.74 | 0.57 | 7.95 | 0.82 | 6.47 | 0.57 | 8.01 | 2.34 | 17.2 |
| 91 | 2OHU | 8.35 | 8.39 | 0.71 | 1.23 | 2.94 | 8.57 | 4.28 | 8.54 | 19.89 |
| 92 | 2VNM | 10.31 | 2.88 |  |  | 9.19 | 6.3 |  |  |  |
| 93 | 5HE7 | 1.2 | 0.7 | 0.16 | 1.19 | 8.17 | 0.26 | 0.21 |  | 13.61 |
| 94 | 5IE1 | 6.21 | 4.61 | 0.76 | 4.64 | 6.08 | 6.86 | 3.58 | 4.1 | 19.98 |
| 95 | 4H3F | 0.28 | 0.98 | 0.41 | 0.25 | 9.58 | 0.39 | 0.2 |  | 14.85 |
| 96 | 5I3V | 1.83 | 4.67 | 0.16 | 0.64 | 6.14 | 6.6 | 5.14 | 5.21 | 14.84 |
| 97 | 4HA5 | 5.65 | 1.76 | 8.51 | 8.8 | 7.21 | 1.23 | 0.84 | 8.52 | 15.44 |
| 98 | 4K8S | 0.87 | 0.51 | 0.36 | 0.51 | 9.27 | 6.85 | 0.23 |  | 10.42 |
| 99 | 3DV1 | 8.91 | 1.19 | 0.56 | 0.57 | 9 | 4.76 | 0.48 |  | 16.14 |
| 100 | 5QCX | 11.27 | 1.17 | 0.29 | 0.46 | 7.44 | 8.51 | 0.44 | 11.73 | 10.43 |
| 101 | 3UFL | 0.81 | 1.53 | 0.32 | 0.49 | 5.4 | 4.39 | 0.52 | 7.14 | 20.01 |
| 102 | 2VA6 | 5.83 | 0.8 | 0.55 | 5.83 | 7.47 | 0.5 | 6.21 | 5.49 | 14.33 |
| 103 | 2VIZ | 1.18 | 4.35 | 0.31 | 0.52 | 7.88 | 4.88 | 0.49 | 9.24 | 21.23 |
| 104 | 3R2F | 2.73 | 7.33 | 0.42 | 4.69 | 7.51 | 9.51 | 0.7 |  | 8.51 |
| 105 | 4EWO | 9.42 | 1.85 | 0.35 | 9.49 | 8.32 | 6.63 | 0.5 | 9.29 | 15.21 |
| 106 | 4FM8 | 0.21 | 0.65 | 1.72 | 0.4 | 6.32 | 4.57 | 1.09 | 6.01 | 14.8 |
| 107 | 4I0I | 0.9 | 2.05 | 0.23 | 0.99 | 6.63 | 6.94 | 0.39 | 2.04 | 19.63 |
| 108 | 2XFJ | 7.28 | 6.69 | 25.52 | 0.73 | 7.9 | 7 | 0.3 | 10.07 | 11.37 |
| 109 | 5QCW | 0.73 | 0.93 | 0.11 | 0.59 | 8.99 | 8.12 | 0.46 |  | 14.71 |
| 110 | 4LC7 | 7.36 | 9.24 | 0.89 | 4.5 | 6.87 | 7.61 | 7.13 | 1.94 | 12.54 |
| 111 | 2VNN | 10.91 | 6.8 | 0.33 | 1.09 | 6.02 | 7.02 | 0.61 | 10.4 | 12.39 |
| 112 | 4DPF | 14.98 | 6.61 | 0.28 | 1.75 | 6.46 | 11.55 | 0.64 | 15.74 | 16.97 |
| 113 | 5QCT | 10.68 | 10.23 | 0.41 | 0.71 | 9.02 | 6.4 | 0.45 |  | 12.32 |
| 114 | 4DJV | 1.04 | 1.09 | 0.96 | 0.5 | 7.77 | 1.03 | 0.85 | 5.08 | 12.84 |
| 115 | 6PZ4 | 9.31 | 13.92 | 0.31 | 12.94 | 10.67 | 8.77 | 0.66 | 7.43 | 6.04 |
| 116 | 4J0T | 9.28 | 8.71 | 6.18 | 7.04 | 9.48 | 7.85 | 0.75 | 7.47 | 10.72 |
| 117 | 3DV5 | 1.02 | 0.96 | 0.28 | 0.61 | 7.31 | 6.06 | 0.93 | 9.56 | 10.38 |
| 118 | 4B70 | 5.33 | 4.78 | 4.47 | 0.33 | 7.09 | 7.4 | 0.73 |  | 15.98 |
| 119 | 5QCV | 0.85 | 1.01 | 26.52 | 0.63 | 7.21 | 7.67 | 0.5 | 13.73 | 7.24 |
| 120 | 2VJ6 | 9.68 | 6.72 | 22.24 | 0.64 | 6.91 | 10.05 | 0.8 | 10.96 | 9.18 |
| 121 | 2XFI | 9.9 | 11.34 | 0.18 | 11.45 | 6.99 | 4.37 | 0.87 |  | 15.28 |
| 122 | 5I3W | 10.05 | 9.58 | 0.16 | 14.11 | 10.12 | 5.49 | 0.24 | 3.14 | 15.09 |
| 123 | 3UQU | 11.38 | 11 | 0.21 | 12.12 | 9.29 | 7.66 | 0.75 | 12.65 | 11.17 |
| 124 | 4I1C | 5.11 | 4 | 0.32 | 6.94 | 4.64 | 4.62 | 4.58 | 7.59 | 16.16 |
| 125 | 3L5F | 2.17 | 2.54 | 0.38 | 1.9 | 2.9 | 2.13 | 0.86 | 2.08 | 20.66 |
| 126 | 3OOZ | 0.68 | 0.81 | 2.49 | 0.33 | 6.47 | 1.35 | 0.78 | 8.64 | 14.64 |
| 127 | 6BFD | 0.52 | 7.04 | 0.2 | 0.46 | 8.25 | 5.23 | 0.73 |  | 8.7 |
| 128 | 5EZX | 6.51 | 8.74 | 6.54 | 1.13 | 5.91 | 1.81 | 6.67 | 2.33 | 16.39 |
| 129 | 4H3I | 0.69 | 1.82 | 0.36 | 1.8 | 8.9 | 1.41 | 0.72 | 3.88 | 13.53 |
| 130 | 5ENM | 0.67 | 7.37 | 7.24 | 0.56 | 3.83 | 4.07 | 1.38 | 4.46 | 12.76 |
| 131 | 7B1Q | 8.55 | 9.04 | 7.9 | 11.17 | 9.13 | 8.62 | 0.24 | 8.49 | 8.7 |
| 132 | 4R93 | 9.41 | 2.08 | 0.28 | 1.42 | 8.88 | 5.28 | 0.83 | 2.53 | 16.36 |
| 133 | 3K5D | 10.03 | 6.91 | 0.41 | 2.4 | 6.13 | 7.66 | 5.06 | 2.93 | 15.23 |
| 134 | 6JSE | 9.14 | 6.53 | 0.2 | 4.89 | 10.25 | 6.05 | 0.26 | 10.17 | 15.1 |
| 135 | 4LXM | 0.81 | 4.56 | 0.27 | 2.11 | 9.1 | 4.42 | 0.36 | 10.53 | 9.44 |
| 136 | 7B1P | 7.71 | 6.43 | 29.11 | 5.53 | 8.1 | 3.82 | 0.33 | 8.45 | 11.33 |
| 137 | 2WJO | 7.57 | 7.48 | 5.06 | 7.09 | 6.92 | 6.98 | 6.18 |  | 7.13 |
| 138 | 2QMF | 3.54 | 3.7 | 28.38 | 0.76 | 6.56 | 9.4 | 2.74 |  | 14.53 |
| 139 | 2QU3 | 3.52 | 1.61 | 0.77 | 7.71 | 1.32 | 7.42 | 0.85 | 7.7 | 19.07 |
| 140 | 2VA5 | 6.07 | 3.93 | 0.84 | 1.57 | 6.63 | 3.19 | 14.45 | 2.92 | 11.24 |
| 141 | 3S7M | 7.77 | 1.13 | 0.27 | 1.35 | 6.84 | 1.05 | 1.11 | 8.3 | 13.33 |
| 142 | 2OHK | 3.42 | 7.56 | 16.77 | 4.32 | 5.22 | 4.59 | 16.85 | 5.44 | 13.57 |
| 143 | 2B8L | 10.77 | 10.22 | 0.24 | 13.34 | 6.71 | 9.85 | 0.37 |  | 11.78 |
| 144 | 3BUF | 8.69 | 9.84 | 2.06 | 8.69 | 5.77 | 1.69 | 2.88 | 1.84 | 21.12 |
| 145 | 4J1C | 8.36 | 13.81 | 0.41 | 12.38 | 6.77 | 5.65 | 1.42 | 7.74 | 7.09 |
| 146 | 4ZPF | 0.59 | 6.99 | 0.34 | 0.61 | 6.57 | 8.22 | 34.01 | 3 | 15.71 |
| 147 | 4B78 | 1.48 | 8.04 | 0.14 | 0.94 | 3.01 | 3.24 | 0.69 | 2.37 | 13.27 |
| 148 | 7D2X | 8.62 | 7.37 | 11.34 | 9.42 | 8.86 | 5.67 | 2.48 | 7.04 | 12.75 |
| 149 | 3TPR | 6.24 | 9.11 | 0.58 | 5.85 | 6.83 | 7.72 | 0.72 |  | 9.93 |
| 150 | 4R92 | 1.51 | 2.05 | 0.26 | 1.51 | 8.03 | 4.69 | 0.27 | 2.7 | 16.93 |
| 151 | 4FRJ | 0.39 | 7.6 | 0.08 | 0.35 | 7.93 | 0.71 | 1.42 | 7.94 | 14.44 |
| 152 | 5HU0 | 8.09 | 1.07 | 1.51 | 3.75 | 7.53 | 1.01 | 18.65 | 7.98 | 7.6 |
| 153 | 2F3F | 3.87 | 1.27 | 0.11 | 0.59 | 9.37 | 4.8 | 0.29 | 11.16 | 6.14 |
| 154 | 4DH6 | 4.34 | 9.39 | 1.01 | 0.81 | 8.73 | 7.84 | 1.19 |  | 18.42 |
| 155 | 6BFW | 0.56 | 7.73 | 0.43 | 0.38 | 8.64 | 8.48 | 0.34 |  | 17.49 |
| 156 | 3UQX | 11.63 | 10.26 | 0.32 | 11.69 | 6.85 | 6.72 | 0.33 | 8.46 | 16.9 |
| 157 | 4LXK | 0.95 | 2.17 | 27.74 | 0.76 | 6.61 | 3.48 | 0.95 | 9.35 | 12.35 |
| 158 | 3IVI | 1.48 | 8.12 | 0.7 | 0.84 | 8.71 | 6.44 | 0.78 |  | 16.77 |
| 159 | 2OHP | 5.98 | 8.37 | 0.52 | 0.82 | 7.89 | 3.08 | 16.26 | 6.37 | 15.93 |
| 160 | 5QD1 | 1.13 | 1.16 | 0.17 | 2.76 | 3.03 | 2.31 | 0.58 |  | 13.73 |
| 161 | 6UVY | 6.65 | 5.36 | 6.6 | 2.79 | 7.5 | 7.22 | 5.46 | 1.84 | 6 |
| 162 | 4BEK | 5.45 | 6.74 | 1.72 | 1.86 | 5.91 | 5.52 | 4.68 | 3.88 | 12.57 |
| 163 | 3NSH | 1.22 | 8.23 | 0.41 | 0.98 | 7.49 | 9.13 | 0.43 | 8.4 | 17.37 |
| 164 | 2FDP | 4.71 | 4.49 | 0.26 | 0.54 | 5.65 | 7.74 | 0.46 | 3.9 | 17.3 |
| 165 | 2OHQ | 6.75 | 7.39 | 0.4 | 9.18 | 5.31 | 4.12 | 16.98 | 9.26 | 10.7 |
| 166 | 2ZJK | 11 | 7.22 | 7.91 | 8.83 | 8.35 | 5 | 25 | 8.91 | 11.96 |
| 167 | 2OHS | 1.39 | 0.58 | 0.18 | 2.26 | 5.42 | 1.62 | 1.73 | 5.92 | 16.29 |
| 168 | 6UVP | 7.96 | 6.13 | 23.75 |  | 7.96 | 6 |  |  |  |
| 169 | 3UDQ | 8.14 | 0.62 | 0.87 | 0.64 | 6.09 | 8.26 | 0.5 | 3.23 | 18.27 |
| 170 | 1TQF | 9.79 | 5.72 | 0.29 | 9.37 | 8.53 | 8.54 | 1.66 |  | 8.27 |
| 171 | 4XKX | 1.11 | 1.53 | 0.14 | 1.11 | 8.89 | 8.6 | 1.17 | 2.35 | 14.71 |
| 172 | 5HDU | 0.4 | 1.27 | 0.26 | 0.34 | 8.94 | 1.63 | 0.22 |  | 14.17 |
| 173 | 7MYR | 1.88 | 6.8 | 6.89 |  | 7.03 | 5.67 |  |  | 9.23 |
| 174 | 4D89 | 1.36 | 10.41 | 0.45 |  | 6.53 | 4.91 | 0.68 |  |  |
| 175 | 4D83 | 1.83 | 10.38 | 18.71 |  | 3.34 | 7.57 |  |  |  |
| 176 | 3KMY | 5.85 | 2.62 | 0.61 | 1.22 | 4.59 | 5.71 | 1.57 | 2.76 | 19.44 |
| 177 | 1W51 | 7.66 | 6.8 | 0.37 | 3.09 | 9.63 | 7.03 | 1.42 |  | 16.48 |
| 178 | 4ZSQ | 7.05 | 6.9 | 0.61 | 1.86 | 7.88 | 7.59 | 7.44 | 9.24 | 22.39 |
| 179 | 5KQF | 1.48 | 4.37 | 1.25 | 0.51 | 5.55 | 5.21 | 4.78 | 2.31 | 16.88 |
| 180 | 4J1F | 8.25 | 8 | 1.15 | 6.62 | 8.04 | 6.62 | 0.27 | 11.39 | 7.88 |
| 181 | 5YGY | 7.6 | 7.04 | 1.12 | 4.77 | 8.08 | 6.3 | 7.46 | 11.27 | 16.09 |
| 182 | 2HM1 | 1.55 | 10.7 | 0.86 | 1.04 | 8.85 | 5.84 | 1.9 | 6.04 | 9.13 |
| 183 | 3LPI | 0.92 | 10.46 | 0.34 | 1.7 | 6.12 | 4.48 | 3.12 |  | 17.38 |
| 184 | 4BFD | 7.85 | 7.39 | 0.18 | 11.78 | 8.78 | 7.78 | 0.25 | 5.64 | 12.63 |
| 185 | 3VG1 | 10.37 | 10.32 | 42.56 |  | 3.46 | 7 |  |  |  |
| 186 | 3CIB | 1.41 | 3.26 | 0.41 | 0.62 | 7.06 | 6.94 | 2.84 |  | 18.19 |
| 187 | 3N4L | 1.6 | 6.34 | 0.29 | 0.49 | 4.45 | 8.03 | 0.89 | 1.31 | 20.5 |
| 188 | 5QD0 | 11.2 | 1.55 | 0.21 | 0.72 | 8.12 | 3.23 | 0.66 | 11.87 | 14.04 |
| 189 | 6EJ3 | 0.74 | 0.59 | 0.13 | 0.49 | 7.92 | 0.86 | 0.53 | 3.64 | 11.45 |
| 190 | 6BFX | 0.9 | 1.28 | 0.09 | 0.33 | 3.05 | 7.56 | 0.29 | 8.33 | 14.99 |
| 191 | 5HE4 | 0.31 | 0.74 | 0.25 | 0.27 | 8.03 | 1.65 | 0.16 | 1.15 | 14.18 |
| 192 | 4X7I | 6.71 | 7.33 | 0.26 | 8.67 | 8.53 | 6.49 | 6.94 | 4.49 | 20.83 |
| 193 | 5HD0 | 8.71 | 1.39 | 0.25 | 0.81 | 9.43 | 1.01 | 0.6 |  | 15.61 |
| 194 | 2XFK | 10.09 | 11.26 | 0.27 | 11.4 | 9.12 | 7.89 | 0.39 | 2.26 | 19.99 |
| 195 | 4DI2 | 2.02 | 7.61 | 0.28 | 1.06 | 9.44 | 8.99 | 0.52 | 9.23 | 11.92 |
| 196 | 4I12 | 3.46 | 0.88 | 5.34 | 5.7 | 5.99 | 6.17 | 4.85 | 8.85 | 15.48 |
| 197 | 4I0Z | 0.83 | 1.41 | 4.38 | 1.35 | 6.86 | 4.03 | 33.74 | 6.29 | 18.34 |
| 198 | 5YGX | 8.2 | 7.41 | 0.51 | 10.67 | 8.38 | 6.7 | 0.54 | 11.1 | 8.1 |
| 199 | 3DUY | 9.34 | 7.89 | 0.19 | 3.43 | 9.25 | 8.88 | 0.69 | 9.57 | 14.87 |
| 200 | 4K9H | 1 | 1.97 | 0.38 | 2.84 | 9.99 | 4.95 | 0.4 | 11.05 | 18.31 |
| 201 | 3L3A | 8.53 | 8.12 | 6.41 | 1.18 | 1.33 | 1.85 | 1.67 | 8.41 | 15.94 |
| 202 | 5T1U | 4.46 | 4.77 | 0.79 | 1.65 | 8.51 | 6.46 | 0.32 | 4.4 | 10.38 |
| 203 | 4R95 | 9.01 | 7.23 | 0.28 | 1.41 | 8.97 | 4.36 | 0.62 | 2.48 | 10.75 |
| 204 | 3OHH | 2.94 | 10.06 | 0.43 | 2.5 | 5.75 | 5.97 | 7.54 | 2.47 | 19.16 |
| 205 | 3INF | 1.36 | 1.91 | 0.8 | 1.64 | 7.71 | 1.62 | 25.36 | 2.54 | 13.07 |
| 206 | 3PI5 | 0.84 | 7.79 | 0.8 | 0.71 | 9.07 | 4.4 | 0.52 | 13.17 | 7.65 |
| 207 | 3VEU | 11.6 | 6.45 | 0.7 | 1.09 | 6.93 | 9.06 | 0.52 | 2.66 | 19.24 |
| 208 | 7D2V | 7.51 | 8.2 | 0.41 | 5.75 | 7.46 | 4.72 | 0.26 | 10.87 | 11.92 |
| 209 | 4H3J | 2.05 | 1.14 | 0.24 | 1.81 | 9.7 | 3.46 | 0.16 |  | 13.34 |
| 210 | 3RTN | 4.35 | 4.6 | 0.55 | 1.62 | 4.36 | 4.69 | 3.53 | 4.78 | 15.38 |
| 211 | 3BUH | 6.29 | 10.63 | 1.35 | 4.88 | 4.67 | 4.76 | 1.04 | 5.32 | 15.93 |
| 212 | 5I3Y | 7.37 | 9.8 | 0.17 | 8.23 | 8.02 | 10.01 | 6.54 | 9.83 | 19.88 |
| 213 | 3TPP | 10.84 | 1.92 | 0.17 | 7.24 | 6.4 | 8.66 | 0.4 |  | 14.45 |
| 214 | 4B77 | 0.44 | 1.61 | 0.33 | 0.27 | 7.49 | 1.86 | 8.25 | 6.59 | 14.84 |
| 215 | 3UDH | 4.73 | 0.6 | 0.52 | 0.28 | 4.09 | 3.1 | 0.6 | 0.62 | 17.35 |
| 216 | 3VV6 | 3.58 | 6.61 | 4.08 | 1.89 | 6.03 | 4.93 | 4.42 | 3.26 | 10.25 |
| 217 | 5QCY | 1.2 | 6.91 | 0.28 | 2.22 | 9.21 | 9.27 | 0.65 |  | 9.84 |
| 218 | 4L7J | 5.95 | 5.86 | 0.45 | 2.62 | 3.84 | 6.42 | 5.57 | 2.71 | 20.12 |
| 219 | 4PZW | 7.56 | 0.76 | 0.76 | 7.62 | 3.97 | 0.46 | 1.36 | 8.9 | 14.4 |
| 220 | 3HW1 | 5.67 | 6.58 | 5.84 | 5.53 | 5.63 | 5.67 | 5.09 | 4.87 | 13.6 |
| 221 | 6NV9 | 0.81 | 1.98 | 24.83 | 0.72 | 7.93 | 5.1 | 0.7 | 11.56 | 18.43 |
| 222 | 5QCQ | 9.08 | 5.06 | 9.79 | 1.11 | 7.63 | 8.41 | 2.04 | 6.39 | 15.91 |
| 223 | 2IRZ | 11.2 | 12.19 | 0.14 | 11.58 | 8.3 | 7.4 | 0.2 | 11.69 | 18.25 |
| 224 | 4RRO | 4.18 | 0.53 | 0.25 | 0.46 | 7 | 0.34 | 7.65 | 8.09 | 15.93 |
| 225 | 3VV7 | 1.9 | 6.25 | 0.17 | 6.56 | 6.85 | 5.31 | 5.89 | 0.52 | 14.28 |
| 226 | 6JSN | 5.23 | 7.01 | 0.31 | 4.24 | 5.74 | 9.12 | 0.26 | 10.91 | 8.46 |
| 227 | 3INE | 1.71 | 1.82 | 1.3 | 1.47 | 4.99 | 1.84 | 1.04 | 6.1 | 17.81 |
| 228 | 4JOO | 4.63 | 5.61 | 5.1 | 0.28 | 4.98 | 0.37 | 4.84 | 1.01 | 18.49 |
| 229 | 3H0B | 7.36 | 7.33 | 0.25 | 0.37 | 3.43 | 7.07 | 0.27 | 7.53 | 19.55 |
| 230 | 4LXA | 1.03 | 10.22 | 0.45 | 0.54 | 9.24 | 3.66 | 0.35 | 5.33 | 19.45 |
| 231 | 3RSV | 1 | 4.9 | 5.27 | 1.44 | 7.23 | 7.24 | 4.66 | 5.99 | 17.63 |
| 232 | 7B1E | 7.86 | 6.44 | 7.1 | 12.59 | 8.74 | 6.02 | 17.6 | 7.81 | 11.95 |
| 233 | 2VIY | 7.77 | 9.83 | 0.3 | 1.18 | 7.97 | 5.38 | 0.8 | 10.48 | 12.53 |
| 234 | 4I0J | 0.74 | 1.52 | 0.22 | 0.59 | 9.07 | 5.16 | 0.45 | 9.52 | 16.77 |
| 235 | 5QCU | 0.72 | 1.05 | 0.43 | 0.66 | 2.75 | 4.54 | 0.4 | 13.75 | 21.81 |
| 236 | 2IS0 | 12.12 | 11.91 | 0.31 | 6.49 | 6.95 | 6.96 | 0.61 | 11.69 | 13.17 |
| 237 | 4R91 | 1.65 | 2.37 | 0.96 | 1.58 | 5.43 | 2.71 | 0.51 | 3.23 | 19.16 |
| 238 | 4JPC | 3.99 | 0.55 | 0.36 | 1.98 | 7.36 | 0.6 | 7.83 | 2.43 | 15.4 |
| 239 | 3UQW | 10.76 | 7.15 |  | 9.1 | 7.21 | 7.19 | 0.41 | 1.79 | 10.55 |
| 240 | 3CID | 6 | 9.94 | 0.22 | 0.64 | 4.48 | 9.37 | 2.61 |  | 18.49 |
| 241 | 3CKP | 9.32 | 9.6 | 0.36 | 2.59 | 7.66 | 5.17 | 4.32 | 9.75 | 21.66 |
| 242 | 4DJX | 1.29 | 1.33 | 8.28 | 1.1 | 6.88 | 0.51 | 0.98 | 4.04 | 14.16 |
| 243 | 4PZX | 7.71 | 0.88 | 0.36 | 0.46 | 7.38 | 0.97 | 22.66 | 3.74 | 14.39 |
| 244 | 3L5C | 9.96 | 4.74 | 6.42 | 3.14 | 8.7 | 7.91 | 5.05 | 3.27 | 7.25 |
| 245 | 5QCP | 1.06 | 1.28 | 0.07 | 2.2 | 7.55 | 3.04 | 1.72 |  | 17.94 |
| 246 | 2G94 | 11.27 | 11.22 | 0.3 | 2.37 | 6.93 | 5.87 | 7.65 | 3.52 | 12.31 |
| 247 | 6UVV | 6.34 | 11.2 | 5.19 | 1.24 | 6.96 | 7.01 | 5.13 | 6.36 | 10.43 |
| 248 | 2P8H | 10.02 | 9.91 | 0.27 | 13.1 | 8.41 | 5.82 | 0.31 |  | 11.32 |
| 249 | 4HZT | 0.46 | 1.05 | 0.39 | 0.64 | 8.55 | 4.86 | 4.39 | 4.61 | 14.89 |
| 250 | 3RTM | 4.6 | 4.96 | 3.96 | 4.17 | 3.99 | 5.42 | 3.26 | 5.96 | 14.34 |
| 251 | 4ZPE | 0.28 | 1.31 | 0.41 | 0.48 | 6.29 | 7.03 | 28.85 | 2.86 | 14.53 |
| 252 | 2QP8 | 8.45 | 11.04 | 0.24 | 0.82 | 8.69 | 2.95 | 2.98 |  | 19.04 |
| 253 | 4DPI | 14.04 | 6.38 |  |  | 6.18 | 9.84 |  |  |  |
| 254 | 4RRS | 4.6 | 8.29 | 6.68 | 0.35 | 7.25 | 1.34 | 7 | 7.54 | 11.86 |
| 255 | 2WF1 | 0.91 | 6.75 | 0.38 | 2 | 9.26 | 9.07 | 0.57 | 10.28 | 10.68 |
| 256 | 2QZK | 14.19 | 14.98 | 0.15 | 15.3 | 6.99 | 7.78 | 0.95 |  | 12.73 |
| 257 | 5QCR | 5.64 | 1.21 | 0.33 | 0.5 | 8.47 | 8.36 | 0.67 | 10.79 | 20.74 |
| 258 | 4I0D | 4.38 | 0.88 | 4.73 | 6.69 | 4 | 4.59 | 8.63 | 7.11 | 20.73 |
| 259 | 3ZMG | 7.38 | 13.38 | 0.41 | 7.52 | 6.69 | 7.42 | 1 | 8.2 | 7.92 |
| 260 | 3KN0 | 7.19 | 6.11 | 3.98 | 1.7 | 7.01 | 6.67 | 4.44 | 5.78 | 15.01 |
| 261 | 3LHG | 1.03 | 1.23 | 0.39 | 0.31 | 7.38 | 1.89 | 1.81 | 7.96 | 15.27 |
| 262 | 2VJ7 | 9.57 | 11.34 | 0.34 | 1.4 | 9.19 | 5.04 | 0.53 | 11.19 | 15.96 |
| 263 | 5QDC | 0.4 | 0.76 | 0.41 | 1.03 |  | 5.37 | 0.55 |  | 7.05 |
| 264 | 2QZL | 10.14 | 7.45 | 0.19 | 11.75 | 7 | 6.74 | 0.53 | 13.57 | 17.12 |
| 265 | 4FRI | 0.68 | 8.96 | 0.3 | 0.39 | 7.58 | 1.43 | 1.2 | 7.35 | 13.31 |
| 266 | 3RSX | 5.19 | 6.11 | 1.3 | 1.68 | 5.05 | 5.26 | 1.41 | 3.54 | 15.67 |
| 267 | 5QDD | 13.91 | 0.7 | 0.32 | 1.09 |  | 4.86 | 0.77 |  | 14.15 |
| 268 | 3CKR | 9.19 | 9.37 | 2.43 | 11.06 | 9.28 | 8.91 | 2.93 | 10.65 | 18.8 |
| 269 | 4FSL | 7.35 | 1.33 | 0.64 | 5.75 | 9.2 | 8.47 |  | 4.94 | 16.38 |
| 270 | 2WF4 | 7.53 | 1.87 | 0.22 | 0.44 | 7.68 | 4.87 | 0.29 | 11.3 | 4.38 |
| 271 | 5MCO | 12.55 | 12.17 | 0.12 | 6 | 5.94 | 7.1 | 0.34 | 7.16 | 15.12 |
| 272 | 5TOL | 6.41 | 6.67 | 7.21 | 11.16 |  | 8.16 | 0.8 |  | 11.57 |
| 273 | 6EQM | 8.36 | 8.31 | 0.42 | 11.82 |  | 5.63 | 0.2 | 11.18 | 17.51 |
| 274 | 4FRK | 8.3 | 1.84 | 0.26 | 0.92 | 8.34 | 8.25 | 0.88 | 8 | 12.27 |
| 275 | 2VKM | 11.09 | 7.08 | 0.47 | 2.35 | 6.82 | 9.12 | 1.33 | 5.89 | 12.05 |
| 276 | 3SKF | 2.75 | 11.37 | 0.36 | 2.66 | 9.39 | 9.36 | 1.69 |  | 11.94 |
| 277 | 4J1E | 7.84 | 7.51 | 0.21 | 11.1 | 8 | 5.95 | 0.31 | 5.92 | 12.28 |
| 278 | 4RRN | 7.3 | 0.87 | 0.92 | 0.38 | 7.2 | 0.86 | 1.59 | 8.18 | 12.92 |
| 279 | 2QMG | 1.42 | 10.79 | 0.25 | 0.56 | 6.74 | 8.11 | 0.3 |  | 11.79 |
| 280 | 2B8V | 5.33 | 7.2 | 0.28 | 0.6 | 6.94 | 3.56 | 0.83 |  | 15.34 |
| 281 | 2OHT | 7.46 | 6.65 | 6.46 | 3.86 | 3.15 | 6.98 | 24.54 | 7.82 | 13.76 |
| 282 | 4I0G | 3.42 | 1.65 | 0.31 | 5.13 | 4.33 | 3.32 | 0.31 | 7.63 | 8.65 |
| 283 | 7MYU | 3.07 | 11.02 | 0.46 | 4.52 |  | 9.8 | 0.14 | 10.5 | 18.02 |
| 284 | 4RCE | 8.54 | 1.57 | 0.27 | 1.04 | 8.53 | 8.54 | 0.85 | 8.86 | 14.64 |
| 285 | 2QK5 | 9.34 | 11.09 | 30.19 | 1.77 | 9.08 | 5.41 | 2 | 2.05 | 17.32 |
| 286 | 6E3Z | 7.1 | 7 | 1.71 | 7.59 |  | 7.63 | 0.88 | 9.83 | 12.52 |
| 287 | 3BUG | 1.99 | 9.92 | 2.12 | 3.32 | 5.52 | 2 | 2.76 | 3.84 | 15.09 |
| 288 | 5QD9 | 1.01 | 0.66 | 0.74 | 0.57 |  | 5.66 | 0.73 | 14.06 | 9.2 |
| 289 | 5QCO | 10.65 | 0.66 | 10.6 | 0.94 |  | 3.43 | 0.76 |  | 16.95 |
| 290 | 3WB5 | 3.25 | 2.96 | 5.29 | 0.89 | 5.76 | 4.09 | 2.76 | 2.28 | 19.97 |
| 291 | 2ZJH | 2.36 | 8.12 | 0.46 | 2.39 | 9.37 | 8.06 | 6.87 | 1.78 | 19.24 |
| 292 | 2OAH | 4.85 | 6.8 | 18.21 | 0.53 | 7.96 | 6.95 | 0.82 | 4.77 | 14.68 |
| 293 | 4JP9 | 7.25 | 0.72 | 0.16 | 0.3 | 6.93 | 0.14 | 1.28 | 5.45 | 11.58 |
| 294 | 2VIE | 1.59 | 6.8 | 0.19 | 1.21 | 7.33 | 9.16 | 0.51 | 10.6 | 13.61 |
| 295 | 6NV7 | 0.93 | 1.76 | 0.18 | 0.87 |  | 7.56 | 0.88 | 12.11 | 11.88 |
| 296 | 4R5N | 4.97 | 0.78 | 0.22 | 7.72 | 7.16 | 4.37 | 7.01 | 7.08 | 9.66 |
| 297 | 5QD2 | 0.92 | 2.83 | 0.13 | 0.33 |  | 5.01 | 0.44 |  | 16.74 |
| 298 | 3ZOV | 9.72 | 10.23 | 0.67 | 13.9 | 10.61 | 4.71 | 5.93 | 9.46 | 9.33 |
| 299 | 3IND | 5.06 | 1.97 | 3.58 | 0.77 | 6.72 | 2.07 | 3.58 | 5.14 | 14.11 |
| 300 | 4J1I | 7.96 | 8.25 | 0.17 | 9.15 | 7.71 | 7.42 | 0.3 | 6.39 | 11.69 |
| 301 | 1XS7 | 6.44 | 6.42 |  | 4.3 | 6.03 | 8.48 | 4.27 |  | 15.6 |
| 302 | 3UDY | 2.02 | 0.55 | 0.45 | 0.36 | 9 | 3.77 | 0.35 | 2.45 | 15.26 |
| 303 | 5T1W | 5.48 | 8.1 | 0.71 | 7.31 |  | 7.02 | 5.03 | 7.46 | 7.1 |
| 304 | 6NW3 | 12.87 | 1.46 | 0.1 | 0.34 |  | 7.36 | 0.63 | 14.31 | 18.22 |
| 305 | 5QD6 | 0.94 | 1.78 | 0.19 | 0.48 |  | 8.92 | 0.8 | 1.74 | 10.82 |
| 306 | 3EXO | 10.67 | 13.04 | 6.35 | 8.84 | 9.58 | 7.62 | 8.15 | 10.1 | 28.43 |
| 307 | 6JT3 | 8.1 | 7.35 | 2.93 | 11.04 |  | 8.35 | 0.29 | 8.5 | 8.18 |
| 308 | 4DJU | 4.62 | 1.36 | 0.62 | 0.48 | 4.98 | 1.68 | 0.7 | 1.94 | 26.19 |
| 309 | 4J0Y | 8.35 | 7.59 | 0.42 | 7.88 | 6.79 | 5.69 | 0.23 | 7.56 | 6.82 |
| 310 | 3UDP | 0.5 | 0.79 | 0.15 | 0.29 | 6.41 | 4.63 | 0.28 | 4.06 | 19.93 |
| 311 | 3K5F | 10.89 | 6.65 | 0.41 | 1.47 | 7 | 5.93 | 0.31 | 5.83 | 23.31 |
| 312 | 4XXS | 1.45 | 7.22 | 0.41 | 1.33 | 4.01 | 4.71 | 4.16 | 2.46 | 18.99 |
| 313 | 3CIC | 0.57 | 11.34 | 33.36 | 0.53 | 7.86 | 8.93 | 2.71 |  | 20.68 |
| 314 | 4J0V | 7.54 | 10.22 | 0.13 | 8.51 | 7.82 | 5.05 | 1.56 | 10.86 | 10.58 |
| 315 | 3QBH | 8.15 | 10.47 | 0.29 | 0.55 | 9.25 | 8.84 | 0.41 | 7.64 | 15.88 |
| 316 | 4ZSM | 4.34 | 7.91 | 1 | 1.38 | 4.87 | 6.16 | 3.91 | 3.51 | 14 |
| 317 | 3UDJ | 3.36 | 1.06 | 0.12 | 0.98 | 5.95 | 1.59 | 0.93 | 2.29 | 12.83 |
| 318 | 5QDB | 1.02 | 0.73 | 0.19 | 0.53 |  | 9.37 | 1.76 | 12.23 | 14.97 |
| 319 | 5F00 | 8.34 | 6.5 | 7.81 | 4.84 | 9.48 | 5.1 | 6.03 | 3.92 | 11.76 |
| 320 | 2IQG | 2.48 | 10.14 | 0.26 | 1.63 | 8.97 | 9.33 | 2.74 | 11.68 | 14.5 |
| 321 | 3RU1 | 7.33 | 4.71 | 32.38 |  | 7.96 | 4.97 |  |  |  |
| 322 | 2PH6 | 12.42 | 12.27 | 0.4 | 11.62 | 7.19 | 7.75 | 0.78 | 10.99 | 9.69 |
| 323 | 4I0H | 2.39 | 9.47 | 0.25 | 1.82 | 8.05 | 9.86 | 0.75 |  | 18.38 |
| 324 | 4WTU | 0.36 | 0.58 | 0.67 | 0.31 | 8.51 | 1.67 | 1.27 | 3.92 | 8.96 |
| 325 | 4D88 | 1.05 | 9.25 | 0.26 | 0.82 | 6.85 | 8.98 | 0.24 | 10.31 | 14.56 |
| 326 | 6BFE | 1 | 7.78 | 0.28 | 0.59 |  | 5.14 | 0.18 | 8.19 | 8.4 |
| 327 | 3L5D | 8.8 | 8.97 | 3.66 | 9.18 | 8.68 | 3.88 | 7 | 8.04 | 15.3 |
| 328 | 3UDR | 2.57 | 0.48 | 6.12 | 0.36 | 4.85 | 7.31 | 6.37 | 2.81 | 13.28 |
| 329 | 4KE1 | 0.99 | 0.62 | 0.25 | 0.38 | 1.76 | 5.52 | 0.45 |  | 12.84 |
| 330 | 3IN4 | 2.23 | 2.55 | 6.35 | 0.57 | 7.27 | 0.98 | 0.44 | 2.97 | 14.07 |
| 331 | 3K5G | 10.21 | 4.46 | 0.54 | 0.57 | 9.09 | 3.63 | 1.73 | 9.92 | 13.53 |
| 332 | 4R8Y | 1.79 | 2.4 | 0.33 | 1.6 | 2.32 | 2.34 | 4.73 | 5.02 | 18.42 |
| 333 | 4H3G | 8.84 | 0.63 | 1.07 | 3.53 | 8.53 | 0.56 | 1.59 |  | 19.85 |
| 334 | 3I25 | 12.65 | 12.17 |  | 4.75 | 6.27 |  | 2.21 | 13.44 |  |
| 335 | 3S2O | 6.37 | 5.96 | 1.68 | 3.94 | 6.04 | 1.71 | 3.56 | 4.43 | 10.21 |
| 336 | 3SKG | 5.34 | 2.49 | 0.19 | 5.09 | 9.42 | 6.37 | 0.93 | 10.19 | 17.92 |
| 337 | 4FRS | 7.08 | 0.18 | 0.31 | 0.25 | 7.46 | 2.14 | 0.29 | 11.06 | 10.56 |
| 338 | 3KMX | 1.47 | 5.7 | 0.41 | 1.17 | 7.07 | 3.17 | 3.03 | 2.99 | 18.11 |
| 339 | 5EZZ | 8.14 | 8.36 | 0.86 | 1.84 | 8.72 | 3.52 | 5.94 | 1.89 | 14.32 |
| 340 | 4ZSP | 7.22 | 9.09 | 0.6 | 3.84 | 7.12 | 7.4 | 0.47 | 9.59 | 14.9 |
| 341 | 2P4J | 13 | 9.78 | 27.95 | 13.92 | 5.67 | 11.38 | 8.94 | 11.95 | 15.79 |
| 342 | 7D36 | 8.28 | 7.64 | 5.76 | 10.83 |  | 7.35 | 5.28 |  | 10.75 |
| 343 | 6UWP | 1.77 | 8.45 | 0.29 | 1.94 |  | 8.07 | 0.61 | 4.54 | 14.69 |
| 344 | 3L5E | 3.66 | 3.64 | 0.8 | 7.98 | 9.28 | 6.93 | 5.88 | 3.68 | 10.85 |
| 345 | 3UDN | 2.06 | 0.49 | 0.57 | 0.23 | 8.82 | 7.96 | 4.44 | 1.43 | 10.55 |
| 346 | 2VIJ | 9.33 | 10.92 |  |  | 7.63 | 9.41 |  |  |  |
| 347 | 4I0F | 0.39 | 2.99 | 4.76 | 5 | 3.99 | 3.05 | 9.13 | 6.17 | 6.12 |
| 348 | 3LPJ | 9.54 | 3.86 | 29.2 | 0.55 | 7.17 | 9.1 | 3.15 |  | 20.35 |
| 349 | 3QI1 | 1.2 | 2.4 | 0.45 | 0.77 | 6.31 | 5.74 | 0.35 |  | 19.84 |
| 350 | 5HDX | 2.65 | 3.35 | 0.29 | 3.22 | 5.73 | 2.37 | 4.7 |  | 10.28 |
| 351 | 3RTH | 4.89 | 4.76 | 0.35 | 3.89 | 6.08 | 5.55 | 3.98 | 4.3 | 15.52 |
| 352 | 5ENK | 0.49 | 8.89 | 0.63 | 0.38 | 6.4 | 3.9 | 0.72 | 8.26 | 15.9 |
| 353 | 4DJW | 7.27 | 0.98 | 6.05 | 0.85 | 7.14 | 1.14 | 17.41 | 3.11 | 6.9 |
| 354 | 5QCS | 3.84 | 2.92 | 0.32 | 0.64 |  | 6.61 | 0.65 | 12.18 | 15.54 |
| 355 | 4RCD | 9.54 | 1.22 | 8.27 | 0.94 | 9.11 | 9.53 | 8.23 | 5.31 | 18.52 |
| 356 | 4J0Z | 7.45 | 7.69 | 0.37 | 6.74 | 6.68 | 7.41 | 0.94 | 10.95 | 11.25 |
| 357 | 2OHL | 5.07 | 6.8 | 15.31 | 6.83 | 4.97 | 3.03 | 15.35 | 3.98 | 13.76 |
| 358 | 3L59 | 6.19 | 3.13 | 0.93 | 1.87 | 4.92 | 5.05 | 4.91 | 3.31 | 13.78 |
| 359 | 2ZJJ | 9.92 | 9.25 | 5.77 | 6.13 | 6.68 | 4.23 | 2.32 | 12.2 | 7.47 |
| 360 | 3RVI | 0.65 | 7.98 | 0.61 | 1.62 | 7.01 | 4.13 | 5.26 | 4.21 | 13.28 |
| 361 | 2ZJI | 4.19 | 8.3 | 2 | 7.49 | 2.82 | 6.92 | 1.55 | 6.18 | 10.03 |
| 362 | 3WB4 | 6.38 | 3.01 | 0.46 | 2.58 | 5.99 | 5.62 | 3.05 | 2.13 | 11.54 |
| 363 | 2Q11 | 6.17 | 6.42 | 3.91 | 9.22 | 5.88 | 6.79 | 4.19 | 6.71 | 17.8 |
| 364 | 4N00 | 7.45 | 5.64 | 0.99 | 0.99 | 7.22 | 1.48 | 7.81 | 1.02 | 14.49 |
| 365 | 6UWV | 1.87 | 7.96 | 0.71 | 1.83 |  | 2.21 | 1.25 | 8.01 | 14.26 |
| 366 | 6DHC | 5 | 11.06 | 12.22 | 5.16 |  | 7.35 | 8.95 | 11.59 | 10.96 |
| 367 | 3MSL | 3.95 | 7.92 | 4.4 | 4.33 | 5.2 | 5.76 | 5 | 5.93 | 11.21 |
| 368 | 2QU2 | 4.38 | 2.2 | 5.5 | 3.24 | 7.98 | 5.96 | 2.93 | 3.12 | 10.1 |
| 369 | 4I0E | 3.08 | 1.1 | 0.62 | 7.47 | 4.13 | 3.04 | 2.9 | 6.79 | 10.91 |
| 370 | 5QD4 | 11.32 | 6.83 | 0.22 | 13.93 |  | 11.85 | 25.14 |  | 13.87 |
| 371 | 4WY6 | 0.76 | 6.74 | 0.35 | 0.56 | 4.4 | 1.05 | 0.29 | 1.74 | 6.58 |
| 372 | 2F3E | 12.32 | 5.83 | 0.21 | 13.81 | 11.27 | 11.01 | 24.36 |  | 14.42 |
| 373 | 5UYU | 9.5 | 0.56 | 0.34 | 1.94 |  | 9.14 | 0.53 |  | 15.08 |
| 374 | 6DMI | 8.51 | 8.78 |  |  |  | 2.48 |  |  |  |
| 375 | 7F1D | 9.42 | 7.29 | 0.18 | 8.07 |  | 8.03 | 0.35 | 12.21 | 14.19 |
| 376 | 7N66 | 9.22 | 11.24 | 0.16 | 12.71 |  | 6.32 | 0.76 | 12.54 | 14.95 |
| 377 | 3IGB | 1.75 | 4.6 | 1.93 | 0.8 | 5.06 | 1.49 | 0.66 | 4.08 | 14.11 |
| 378 | 5QDA | 1.18 | 0.99 | 0.19 | 1.26 |  | 4.79 | 0.61 |  | 15.28 |
| 379 | 2OHM | 4.89 | 5.55 | 4.05 | 2.66 | 5.53 | 5.74 | 19 | 4.46 | 13.41 |
| 380 | 6WNY | 8.86 | 8.99 | 0.2 | 5.84 |  | 9.49 | 0.39 | 5.07 | 21.09 |
| 381 | 3MSK | 4.73 | 5.37 | 3.04 | 5.96 | 3.4 | 3.45 | 3.03 | 4.12 | 14.29 |
| 382 | 4DJY | 1.05 | 9.47 | 1.13 | 0.83 | 7.58 | 0.64 | 11.36 | 10.28 | 14.99 |
| 383 | 3U6A | 5.62 | 8.13 | 0.45 | 11.16 | 5.18 | 5.65 | 1.74 | 10.91 | 12.82 |
| 384 | 3VF3 | 0.91 | 1.16 | 0.42 | 0.46 | 9.37 | 3.78 | 0.32 | 8.75 | 9.57 |
| 385 | 6JSG | 7.52 | 7.33 | 0.5 | 8.01 |  | 6.92 | 0.49 | 8.03 | 10.79 |
| 386 | 3L38 | 1.58 | 1.37 | 0.29 | 0.75 | 1.49 | 3.11 | 1.35 | 8.07 | 16.53 |
| 387 | 2ZJL | 1.36 | 1.26 | 0.47 | 1.79 | 6.66 | 5.81 | 1.81 | 1.98 | 7.98 |
| 388 | 2VJ9 | 8.92 | 2.75 | 0.16 | 0.72 | 7.59 | 3.98 | 0.66 | 5.98 | 11.34 |
| 389 | 5QCZ | 0.64 | 0.57 | 0.23 | 0.63 |  | 5.99 | 0.6 |  | 11.04 |
| 390 | 2WF2 | 1.1 | 5.95 | 0.64 | 1.74 | 6.22 | 6.36 | 0.56 | 10.98 | 13.18 |
| 391 | 5F01 | 7.81 | 7.42 | 1.14 | 8.84 | 8.16 | 7.98 | 0.49 |  | 11.76 |
| 392 | 4B0Q | 0.49 | 7.75 | 0.48 | 2.21 | 5.38 | 1.65 | 1.63 |  | 16.87 |
| 393 | 4ACU | 0.89 | 0.69 | 0.47 | 0.39 | 7.67 | 0.45 | 0.6 |  | 18.2 |
| 394 | 4B05 | 0.72 | 6.42 | 8.63 | 0.4 | 7.71 | 7.27 | 6.7 |  | 16.24 |
| 395 | 4GMI | 1.34 | 1.01 |  |  | 2.55 | 8.76 |  |  |  |
| 396 | 4GID | 10.05 | 9.91 | 0.18 |  | 7.33 | 8.78 | 0.77 |  |  |
| 397 | 4ACX | 0.71 | 1.24 | 1.69 | 0.42 | 6.67 | 1.02 | 0.66 |  | 22.58 |
| 398 | 4B00 | 8.31 | 1.88 | 0.39 | 0.52 | 6.06 | 6.23 | 0.2 |  | 13.92 |
| 399 | 5HU1 | 7.36 | 1.1 | 0.14 | 4.31 | 7.28 | 4.63 | 0.34 | 10.72 | 13.56 |
| 400 | 4B1D | 0.67 | 1.8 | 0.38 | 0.36 | 7.65 | 5.88 |  |  | 15.9 |
| 401 | 4AZY | 0.74 | 6.55 | 1.52 | 0.25 | 8.01 | 6.18 | 6.25 |  | 17.12 |

**Table S2: Root Mean Square Deviation (RMSD) values of the lowest-RMSD docking poses.**

|  | PDB ID | AutoDock Vina Rigid | AutoDock Rigid | DOCK 6 Rigid | GNINA Rigid | AutoDock Vina Flexible | AutoDock Flexible | DOCK 6 Flexible | GNINA Flexible | DiffDock |
| --- | --- | --- | --- | --- | --- | --- | --- | --- | --- | --- |
| 0 | 4D85 | 0.38 | 0.84 | 0.1 | 0.26 | 4.94 | 3.46 | 0.27 | 3.77 | 10.01 |
| 1 | 5QD8 | 0.5 | 0.41 | 0.25 | 0.23 | 5.23 | 2.74 | 0.19 | 4.38 | 3.05 |
| 2 | 2NTR | 6.04 | 6.45 | 0.22 | 4.51 | 3.06 | 3.07 | 0.3 | 4.52 | 7.11 |
| 3 | 2VA7 | 3.83 | 0.53 | 4.18 | 3.02 | 5.25 | 1.88 | 2.25 | 2.66 | 6.13 |
| 4 | 6EJ2 | 0.93 | 0.92 | 0.95 | 0.68 | 0.97 | 0.72 | 1.41 | 1.8 | 5.66 |
| 5 | 4B1C | 2.06 | 4.04 | 0.39 | 1.68 | 4.82 | 2.75 | 0.39 |  | 4.06 |
| 6 | 5KR8 | 1.02 | 0.84 | 0.59 | 0.56 | 2.36 | 2.49 | 0.79 | 1.71 | 3.99 |
| 7 | 4IVT | 2.5 | 0.65 | 1.51 | 1.09 | 3.15 | 3.37 | 3.47 | 0.98 | 6.51 |
| 8 | 4X2L | 0.71 | 0.42 | 1.13 | 0.64 | 0.92 | 1.43 | 0.6 | 1.68 | 5.89 |
| 9 | 5HDV | 0.51 | 0.64 | 1.42 | 0.27 | 1.83 | 0.32 | 0.37 |  | 6.04 |
| 10 | 3VV8 | 1.01 | 0.51 | 0.9 | 1.16 | 2.52 | 0.83 | 0.58 | 1.88 | 4.76 |
| 11 | 2ZE1 | 2.74 | 3.05 | 3.19 | 2.43 | 3.16 | 4.08 | 1.04 | 2.46 | 6.41 |
| 12 | 2Q15 | 3.17 | 1.6 | 0.35 | 4.13 | 6.2 | 5.06 | 3.18 | 2.17 | 5.12 |
| 13 | 3DM6 | 7.3 | 10.36 |  |  | 1.98 | 1.81 |  |  |  |
| 14 | 6FGY | 6 | 6.68 | 0.48 | 3.63 | 5.53 | 4.39 | 0.32 | 6.04 | 6.03 |
| 15 | 6C2I | 5.94 | 5.06 | 0.22 | 7.54 | 4.64 | 1.88 | 0.31 | 4.97 | 9.9 |
| 16 | 3IN3 | 1.15 | 1.27 | 0.27 | 0.79 | 4.75 | 0.49 | 0.73 | 1.92 | 7.02 |
| 17 | 4DUS | 0.9 | 1.75 | 0.13 | 0.77 | 3.27 | 3.6 | 0.36 |  | 10.91 |
| 18 | 5I3X | 4.72 | 4.83 | 0.54 | 1.31 | 4.82 | 4.93 | 4.29 | 2.9 | 17.3 |
| 19 | 4FM7 | 0.37 | 0.67 | 0.36 | 0.36 | 4.45 | 2.8 | 0.4 | 4.1 | 6.74 |
| 20 | 5QD7 | 9.45 | 0.81 | 0.18 | 0.75 | 3.26 | 2.84 | 0.28 | 3.35 | 2.97 |
| 21 | 4L7G | 2.04 | 2.37 | 3.42 | 1.08 | 4.32 | 2.1 | 4.17 | 1.45 | 4.25 |
| 22 | 4J1K | 4.92 | 7.35 | 0.25 | 4.8 | 5.57 | 4.2 | 0.38 | 7.71 | 6.26 |
| 23 | 4J17 | 6.3 | 7.73 | 0.81 | 5.68 | 5.79 | 4.82 | 0.27 | 7.87 | 5.28 |
| 24 | 5QD5 | 9.6 | 0.94 | 0.36 | 0.26 | 3.07 | 2.5 | 0.43 | 10.86 | 5.34 |
| 25 | 5HTZ | 0.28 | 0.25 | 0.25 | 1.72 | 5.69 | 1.09 | 0.15 | 3.9 | 7 |
| 26 | 3K5C | 10.17 | 0.48 | 0.11 | 0.5 | 3.3 | 3.38 | 0.35 |  | 6.76 |
| 27 | 2WEZ | 1.47 | 6.62 | 0.2 | 1.82 | 6.08 | 3.5 | 0.78 | 5.62 | 5.44 |
| 28 | 2PH8 | 0.85 | 0.34 | 0.2 | 0.31 | 2.43 | 4.28 | 0.52 | 13.64 | 4.03 |
| 29 | 4ZSR | 3.2 | 1.05 | 0.17 | 1.47 | 2.83 | 4.77 | 0.67 |  | 2.72 |
| 30 | 3INH | 0.9 | 1.2 | 0.39 | 0.79 | 1.56 | 2.06 | 0.66 | 1.65 | 7.33 |
| 31 | 5HE5 | 0.75 | 2.22 | 3.24 | 0.66 | 1.34 | 1.56 | 0.79 |  | 7.39 |
| 32 | 2OHR | 1.64 | 2.08 | 1.84 | 1.82 | 3.72 | 0.99 | 2.94 | 1.85 | 6.11 |
| 33 | 4B1E | 5.75 | 5.75 | 3.19 | 1.53 | 3.83 | 1.38 | 2.68 |  | 5.32 |
| 34 | 3FKT | 0.5 | 1.13 | 0.48 | 1.15 | 4 | 2.73 | 2.22 | 3.39 | 8.25 |
| 35 | 3MSJ | 3.92 | 5.72 | 3.35 | 1.25 | 3.58 | 2.73 | 4.99 | 0.95 | 3.82 |
| 36 | 4RCF | 0.38 | 0.43 | 0.56 | 0.37 | 1.91 | 4.18 | 0.8 | 1.12 | 8 |
| 37 | 4I10 | 0.66 | 3.42 | 0.53 | 5.93 | 3.89 | 2.48 | 0.85 | 4.65 | 5.1 |
| 38 | 2ZDZ | 3.17 | 1.7 | 0.42 | 2.02 | 3.81 | 3.13 | 0.94 | 2.88 | 3.5 |
| 39 | 4ZPG | 0.24 | 0.82 | 0.22 | 0.28 | 3.51 | 1.87 | 5.74 | 2.18 | 5.97 |
| 40 | 3KYR | 6.07 | 3.72 | 9.24 | 5.52 | 10.57 | 5.88 | 6.68 | 4.79 | 9.45 |
| 41 | 5QD3 | 1 | 1.07 | 0.67 | 0.51 | 3 | 1.27 | 0.54 |  | 8.77 |
| 42 | 4FCO | 9.58 | 6.08 |  | 6.93 | 7.99 | 4.23 | 1.61 | 7.92 | 9.76 |
| 43 | 3HVG | 1.13 | 0.56 | 1.05 | 1.19 | 3.54 | 1.56 | 0.26 | 1.88 | 4.07 |
| 44 | 5HDZ | 2.72 | 2.89 | 0.09 | 1.22 | 4.16 | 1.08 |  |  | 7.67 |
| 45 | 5CLM | 5.32 | 7.26 | 0.46 | 5.87 | 5.34 | 4.28 | 0.55 | 5.16 | 6.9 |
| 46 | 7MYI | 1.53 | 1.51 | 5.2 |  | 3.02 | 1.76 |  |  |  |
| 47 | 2HIZ | 1.97 | 10.67 | 0.37 | 1.71 | 4.32 | 4.51 | 1.45 | 2.53 | 7.76 |
| 48 | 4WY1 | 3.71 | 6.45 | 0.47 | 0.74 | 3.69 | 3.17 | 3.41 | 0.89 | 6.29 |
| 49 | 2WF3 | 6.72 | 2.34 | 0.38 | 1.69 | 5.85 | 3.93 | 0.45 | 6.37 | 4.23 |
| 50 | 2ZJN | 0.96 | 3.33 | 3.41 | 1.18 | 3.86 | 4.04 | 0.4 | 2.62 | 5.39 |
| 51 | 6JSF | 3.87 | 3.55 | 0.1 | 3.61 | 4.05 | 4.92 | 0.16 | 6.13 | 6.43 |
| 52 | 2ZJM | 1.28 | 2.99 | 0.37 | 1.14 | 3.76 | 3.36 | 0.34 | 2.33 | 4.63 |
| 53 | 3IXJ | 7.28 | 9.18 |  | 6.15 | 4.89 | 4.26 | 0.5 | 5.12 |  |
| 54 | 4FSE | 1.56 | 1.41 | 0.18 | 1.01 | 5.98 | 2.83 | 2.39 | 1.67 | 4.89 |
| 55 | 6JT4 | 5.46 | 7.46 | 0.53 | 6.79 | 5.53 | 4.72 | 0.46 | 6.91 | 6.25 |
| 56 | 4J0P | 5.48 | 7.65 | 0.14 | 4.55 | 5.7 | 4.76 | 0.33 | 5.97 | 3.72 |
| 57 | 5DQC | 7.76 | 9.72 | 0.16 | 7.47 | 5.85 | 4.59 | 0.43 | 8.39 | 7.99 |
| 58 | 2QMD | 6.19 | 9.26 | 0.22 | 0.59 | 6.26 | 4.39 | 0.26 |  | 6.03 |
| 59 | 2OF0 | 3.6 | 2.2 | 0.53 | 0.82 | 3.55 | 1.74 | 1.7 | 1.03 | 7.19 |
| 60 | 4I11 | 0.63 | 1.54 | 0.21 | 1.27 | 4.39 | 2.45 | 0.33 | 4.64 | 3.64 |
| 61 | 7DCZ | 7.17 | 6.85 | 0.69 | 6.03 | 5.41 | 5.23 | 1.02 | 5 | 4.12 |
| 62 | 7D5A | 3.25 | 6.54 | 0.21 | 3.28 | 5.31 | 4.53 | 0.17 | 5.11 | 6.49 |
| 63 | 2OHN | 1.35 | 0.64 | 0.51 | 0.41 | 2.56 | 1.15 | 0.45 | 1.37 |  |
| 64 | 2WF0 | 2.28 | 5.36 | 14.63 | 0.62 | 3.67 | 3.8 | 0.55 | 3.35 | 4.83 |
| 65 | 4B72 | 0.34 | 0.59 | 1.17 | 0.38 | 1.17 | 2.94 | 1.23 | 3 | 6.25 |
| 66 | 3LNK | 2.02 | 4.01 | 0.51 | 0.86 | 6.77 | 4.98 | 0.41 |  | 5.48 |
| 67 | 4L7H | 2.78 | 6.16 | 5.28 |  | 3.03 | 1.98 |  |  | 4.69 |
| 68 | 3L5B | 4.96 | 5.25 | 4.27 | 2.45 | 2.9 | 2.31 | 2.32 | 2.24 | 3.53 |
| 69 | 3IXK | 3.29 | 10.06 |  | 2.79 | 4.99 | 5.27 | 3.63 | 5.81 |  |
| 70 | 3UDM | 3.91 | 0.65 | 0.4 | 0.38 | 4.44 | 3.13 | 0.41 | 1.99 | 5.85 |
| 71 | 4EXG | 1.21 | 1.7 | 0.14 | 0.69 | 6.04 | 3.86 | 0.25 | 1.66 | 7.13 |
| 72 | 2P83 | 6.09 | 6.33 | 0.25 | 1.69 | 5.77 | 6.52 | 1.56 | 2.38 | 9.16 |
| 73 | 4D8C | 0.97 | 1.99 | 0.26 | 0.93 | 4.74 | 3.72 | 0.39 | 4.88 | 4.91 |
| 74 | 3UDK | 0.51 | 2.92 | 0.25 | 1.11 | 1.24 | 1.72 | 0.25 | 2.03 | 6.61 |
| 75 | 3IVH | 1.64 | 2.61 | 0.11 | 0.83 | 4.42 | 2.64 | 0.22 | 3.25 | 9.21 |
| 76 | 3OHF | 1.5 | 8.43 | 0.26 | 1.61 | 5.29 | 4.14 | 12.55 |  | 8.6 |
| 77 | 4H1E | 0.94 | 0.9 | 3.96 | 0.42 | 1.64 | 1.9 | 1.1 | 2.59 | 5.67 |
| 78 | 3S7L | 1.46 | 1.48 | 4.59 | 1.4 | 4.25 | 1.32 | 0.85 | 2.67 | 5.78 |
| 79 | 4J1H | 6.12 | 7.43 | 1.63 | 4.49 | 4.37 | 4.25 | 0.53 | 4.43 | 6.84 |
| 80 | 3L58 | 8.49 | 6.45 | 0.23 | 0.47 | 5.9 | 4.47 | 1.34 | 4.07 | 11.8 |
| 81 | 4KE0 | 1.3 | 0.9 | 0.2 | 0.21 | 4.7 | 2.76 | 0.2 |  | 7.75 |
| 82 | 4IVS | 5.49 | 3.03 | 3.41 | 2.59 | 5.42 | 3.29 | 1.96 | 2.42 | 3.55 |
| 83 | 3LPK | 0.66 | 5.7 | 0.21 | 0.52 | 6.27 | 4.44 | 0.55 | 4.17 | 3.94 |
| 84 | 6OD6 | 5.56 | 6.46 | 1.05 | 5.5 | 4.92 | 5.33 | 0.71 | 6.69 | 4.28 |
| 85 | 5V0N | 0.86 | 6.62 | 0.31 | 6.69 | 4.93 | 4.37 | 0.43 |  | 9.79 |
| 86 | 4FS4 | 5.72 | 0.45 | 0.13 | 3.83 | 5.29 | 0.63 | 0.53 | 0.89 | 6.92 |
| 87 | 5MXD | 0.78 | 7.13 | 7.27 | 5.14 | 4.84 | 1.85 | 7.4 | 6.59 | 4.46 |
| 88 | 4YBI | 0.51 | 0.89 | 0.2 | 0.37 | 4.26 | 1.78 | 0.19 | 0.73 | 6.08 |
| 89 | 3BRA | 1.78 | 2.96 | 1.27 | 1.05 | 1.92 | 0.94 | 1.92 | 1.23 | 5.2 |
| 90 | 4JPE | 1.53 | 0.49 | 4.3 | 0.82 | 3.53 | 0.48 | 4.76 | 1.88 | 2.15 |
| 91 | 2OHU | 1.72 | 4.7 | 0.71 | 1.23 | 2.94 | 2.61 | 3.72 | 2.81 | 5.86 |
| 92 | 2VNM | 9.83 | 2.88 |  |  | 5.06 | 3.84 |  |  |  |
| 93 | 5HE7 | 1.2 | 0.7 | 0.16 | 1.19 | 0.92 | 0.26 | 0.21 |  | 7.19 |
| 94 | 5IE1 | 1.88 | 3.74 | 0.76 | 3.34 | 4.2 | 3.7 | 3.45 | 3.86 | 5.8 |
| 95 | 4H3F | 0.28 | 0.6 | 0.41 | 0.25 | 3.37 | 0.39 | 0.17 |  | 6.35 |
| 96 | 5I3V | 1.83 | 1.06 | 0.16 | 0.64 | 4.87 | 3.22 | 4.72 | 4.36 | 7.68 |
| 97 | 4HA5 | 3.43 | 0.82 | 0.49 | 3.72 | 6.6 | 0.82 | 0.84 | 2.35 | 6.8 |
| 98 | 4K8S | 0.87 | 0.51 | 0.29 | 0.51 | 2.03 | 1.76 | 0.2 |  | 5.3 |
| 99 | 3DV1 | 8.91 | 0.87 | 0.56 | 0.57 | 3.33 | 3.73 | 0.21 |  | 5.06 |
| 100 | 5QCX | 10.05 | 1.17 | 0.18 | 0.46 | 3.26 | 3.98 | 0.22 | 10.62 | 6.54 |
| 101 | 3UFL | 0.81 | 1.29 | 0.32 | 0.49 | 4.32 | 1.9 | 0.18 | 4.85 | 4.71 |
| 102 | 2VA6 | 5.32 | 0.69 | 0.55 | 1.91 | 5.29 | 0.5 | 0.56 | 3.13 | 13.17 |
| 103 | 2VIZ | 1.18 | 2.32 | 0.31 | 0.52 | 4.92 | 4.46 | 0.33 | 6.76 | 9.82 |
| 104 | 3R2F | 1.89 | 7.33 | 0.42 | 1.03 | 6.35 | 4.28 | 0.65 |  | 7.9 |
| 105 | 4EWO | 0.89 | 1.85 | 0.35 | 1.01 | 5.11 | 4.59 | 0.33 | 3.99 | 9.12 |
| 106 | 4FM8 | 0.21 | 0.64 | 1.72 | 0.4 | 4.12 | 2.12 | 0.52 | 3.65 | 6.56 |
| 107 | 4I0I | 0.9 | 2.05 | 0.23 | 0.76 | 4.65 | 3.81 | 0.29 | 1.78 | 8.64 |
| 108 | 2XFJ | 6.94 | 5.93 | 7.38 | 0.73 | 5.33 | 3.38 | 0.3 | 6.03 | 8.11 |
| 109 | 5QCW | 0.73 | 0.93 | 0.11 | 0.59 | 3.31 | 3.06 | 0.27 |  | 3.75 |
| 110 | 4LC7 | 4.73 | 2.2 | 0.89 | 1.73 | 4.76 | 2.37 | 2.24 | 1.94 | 8.46 |
| 111 | 2VNN | 7.39 | 6.43 | 0.21 | 1.09 | 4.68 | 4.68 | 0.58 | 5.74 | 11.07 |
| 112 | 4DPF | 6.42 | 6.51 | 0.28 | 1.75 | 6.46 | 3.65 | 0.58 | 10.36 | 12.78 |
| 113 | 5QCT | 10.62 | 8.22 | 0.41 | 0.71 | 3.26 | 2.5 | 0.33 |  | 5.64 |
| 114 | 4DJV | 1.04 | 0.48 | 0.96 | 0.5 | 5.28 | 0.78 | 0.8 | 4.48 | 11.15 |
| 115 | 6PZ4 | 6.88 | 6.81 | 0.31 | 7.29 | 5.86 | 5.37 | 0.2 | 6.24 | 6.04 |
| 116 | 4J0T | 5 | 6.23 | 6.18 | 5.67 | 6.35 | 4.89 | 0.21 | 5.39 | 8.35 |
| 117 | 3DV5 | 1.02 | 0.67 | 0.28 | 0.61 | 3.95 | 2.92 | 0.44 | 9.56 | 3.09 |
| 118 | 4B70 | 4.92 | 1.79 | 4.47 | 0.33 | 4.73 | 0.8 | 0.73 |  | 6.18 |
| 119 | 5QCV | 0.85 | 0.53 | 2.4 | 0.63 | 5.38 | 3.65 | 0.44 | 4.27 | 5.77 |
| 120 | 2VJ6 | 5.98 | 6.36 | 11.21 | 0.64 | 4.92 | 2.73 | 0.35 | 6.3 | 8.7 |
| 121 | 2XFI | 9.06 | 3.67 | 0.18 | 7.16 | 6.18 | 4.37 | 0.43 |  | 6.31 |
| 122 | 5I3W | 3.58 | 9.57 | 0.12 | 3.65 | 3.89 | 3.56 | 0.24 | 3.14 | 6.9 |
| 123 | 3UQU | 10.15 | 9.11 | 0.09 | 8.13 | 5.43 | 3.19 | 0.3 | 4.72 | 8.44 |
| 124 | 4I1C | 1.05 | 3.89 | 0.32 | 3.85 | 3.99 | 4.18 | 4.36 | 5.96 | 4.22 |
| 125 | 3L5F | 2.09 | 2.1 | 0.38 | 1.46 | 2.9 | 2.13 | 0.8 | 1.35 | 5.7 |
| 126 | 3OOZ | 0.68 | 0.61 | 0.61 | 0.33 | 4.06 | 1.2 | 0.58 | 2.81 | 5.91 |
| 127 | 6BFD | 0.52 | 4.58 | 0.2 | 0.46 | 5.69 | 2.9 | 0.67 |  | 7.04 |
| 128 | 5EZX | 2.01 | 5.88 | 0.64 | 1.13 | 2.98 | 1.81 | 2.41 | 2.11 | 5.75 |
| 129 | 4H3I | 0.69 | 1.77 | 0.36 | 0.57 | 3.09 | 1.41 | 0.72 | 3.08 | 7.96 |
| 130 | 5ENM | 0.67 | 1.78 | 4.97 | 0.56 | 2.28 | 2.86 | 0.87 | 1.36 | 3.93 |
| 131 | 7B1Q | 6.04 | 5.98 | 5.48 | 5.9 | 4.57 | 3.87 | 0.22 | 6.08 | 4.91 |
| 132 | 4R93 | 1.86 | 1.91 | 0.28 | 1.42 | 4.24 | 2.98 | 0.55 | 2.53 | 4.07 |
| 133 | 3K5D | 1.88 | 6.59 | 0.41 | 2.04 | 4.87 | 3.91 | 2.29 | 2.93 | 1.59 |
| 134 | 6JSE | 5.77 | 4.09 | 0.2 | 4.47 | 4 | 5.74 | 0.26 | 5.3 | 6.79 |
| 135 | 4LXM | 0.81 | 3.1 | 0.27 | 0.65 | 4.51 | 3.84 | 0.36 | 4.97 | 3.52 |
| 136 | 7B1P | 5.82 | 6.08 | 3.3 | 5.53 | 4.52 | 3.82 | 0.21 | 3.89 | 5.4 |
| 137 | 2WJO | 5.73 | 4.48 | 5.06 | 5.39 | 5.7 | 3.14 | 5.64 |  | 7.13 |
| 138 | 2QMF | 3.54 | 3.7 | 6.25 | 0.76 | 5.89 | 4.25 | 1.42 |  | 5.86 |
| 139 | 2QU3 | 1.22 | 0.98 | 0.77 | 1.03 | 1.32 | 0.96 | 0.69 | 2.39 | 7.84 |
| 140 | 2VA5 | 2.77 | 1.34 | 0.81 | 1.57 | 3.58 | 1.02 | 14.27 | 1.82 | 5.95 |
| 141 | 3S7M | 1.12 | 1.1 | 0.27 | 1.35 | 4.84 | 0.5 | 1.11 | 5.86 | 6.76 |
| 142 | 2OHK | 3.42 | 7.08 | 3.04 | 2.26 | 4.47 | 1.53 | 16.16 | 1.36 | 7.57 |
| 143 | 2B8L | 8.01 | 7.61 | 0.15 | 8.31 | 6.71 | 5.1 | 0.28 |  | 7.19 |
| 144 | 3BUF | 2.01 | 3.07 | 1.36 | 1.38 | 2.17 | 1.23 | 1.74 | 1.69 | 19.48 |
| 145 | 4J1C | 5.21 | 7.34 | 0.38 | 5.34 | 6.55 | 4.84 | 0.65 | 6.76 | 6.56 |
| 146 | 4ZPF | 0.59 | 1.52 | 0.34 | 0.61 | 4.07 | 2.14 | 7.39 | 2.24 | 6.52 |
| 147 | 4B78 | 1.48 | 1.36 | 0.14 | 0.94 | 3.01 | 1.31 | 0.68 | 1.39 | 4.6 |
| 148 | 7D2X | 5.13 | 7.37 | 4.14 | 4.58 | 5.52 | 3.99 | 2.21 | 5.26 | 4.8 |
| 149 | 3TPR | 3.03 | 5.83 | 0.46 | 2.55 | 6.76 | 4.68 | 0.7 |  | 4.76 |
| 150 | 4R92 | 1.51 | 1.87 | 0.26 | 1.51 | 4.13 | 1.28 | 0.2 | 2.7 | 8.87 |
| 151 | 4FRJ | 0.39 | 0.64 | 0.08 | 0.35 | 1.87 | 0.51 | 1.42 | 3.2 | 6.72 |
| 152 | 5HU0 | 3.09 | 0.49 | 0.25 | 0.85 | 3.94 | 1.01 | 17.64 | 1.92 | 3.89 |
| 153 | 2F3F | 3.87 | 0.88 | 0.11 | 0.59 | 5.05 | 2.96 | 0.19 | 11.04 | 4.58 |
| 154 | 4DH6 | 1.4 | 4.05 | 1.01 | 0.81 | 5.96 | 3.22 | 1 |  | 3.81 |
| 155 | 6BFW | 0.56 | 2.11 | 0.43 | 0.38 | 5.03 | 3.43 | 0.25 |  | 7.36 |
| 156 | 3UQX | 9.23 | 7.55 | 0.32 | 7.57 | 6.85 | 5.53 | 0.25 | 8.02 | 5.72 |
| 157 | 4LXK | 0.95 | 2.17 | 8.85 | 0.76 | 5.29 | 3.48 | 0.95 | 2.77 | 4.12 |
| 158 | 3IVI | 1.48 | 3.71 | 0.7 | 0.84 | 5.08 | 3.7 | 0.72 |  | 10.84 |
| 159 | 2OHP | 1.97 | 3.23 | 0.52 | 0.82 | 3.79 | 0.9 | 2.51 | 2.93 | 4.39 |
| 160 | 5QD1 | 1.13 | 0.86 | 0.12 | 1.03 | 3.03 | 2.31 | 0.35 |  | 7.33 |
| 161 | 6UVY | 3.95 | 1.32 | 2.04 | 0.84 | 3.67 | 1.11 | 2.56 | 1.84 | 6 |
| 162 | 4BEK | 1.5 | 4.81 | 1.72 | 0.54 | 3.3 | 3.79 | 1.85 | 1.61 | 2.74 |
| 163 | 3NSH | 1.22 | 2.56 | 0.41 | 0.83 | 4.5 | 4.34 | 0.24 | 1.7 | 8.97 |
| 164 | 2FDP | 4.71 | 2.99 | 0.26 | 0.54 | 5.65 | 4.33 | 0.36 | 3.9 | 5.11 |
| 165 | 2OHQ | 5.34 | 5.26 | 0.4 | 2.69 | 4.15 | 1.05 | 1.99 | 2.34 | 6.64 |
| 166 | 2ZJK | 2.29 | 7.17 | 5.12 | 2.41 | 4.2 | 4.67 | 22.5 | 4.33 | 2.68 |
| 167 | 2OHS | 1.39 | 0.54 | 0.18 | 1.41 | 3.89 | 0.92 | 1.73 | 1.76 | 4.69 |
| 168 | 6UVP | 4.89 | 5.79 | 14.71 |  | 3.89 | 5.09 |  |  |  |
| 169 | 3UDQ | 0.99 | 0.41 | 0.87 | 0.64 | 5.52 | 3.05 | 0.5 | 1.9 | 10.04 |
| 170 | 1TQF | 6.29 | 5.72 | 0.29 | 6.85 | 7.64 | 5.27 | 1.46 |  | 8.27 |
| 171 | 4XKX | 1.11 | 1.53 | 0.14 | 0.98 | 1.18 | 1.07 | 1.17 | 2.29 | 4.32 |
| 172 | 5HDU | 0.4 | 1.07 | 0.26 | 0.34 | 3.63 | 1.49 | 0.22 |  | 7.04 |
| 173 | 7MYR | 1.88 | 5.25 | 6.4 |  | 3.06 | 1.63 |  |  | 8.31 |
| 174 | 4D89 | 1.36 | 4.72 | 0.45 |  | 4.73 | 3.94 | 0.46 |  |  |
| 175 | 4D83 | 1.83 | 4.49 | 7.66 |  | 3.13 | 2.75 |  |  |  |
| 176 | 3KMY | 2.17 | 2.61 | 0.61 | 1.22 | 3.56 | 3 | 1.48 | 2.24 | 15.68 |
| 177 | 1W51 | 6.89 | 6.47 | 0.15 | 0.76 | 5.55 | 3.28 | 1.34 |  | 7.73 |
| 178 | 4ZSQ | 3.77 | 6.85 | 0.58 | 1.86 | 3.22 | 1.17 | 0.9 | 3.27 | 4.49 |
| 179 | 5KQF | 1.48 | 3.85 | 1.1 | 0.51 | 3.29 | 4.15 | 1.07 | 1.82 | 6.54 |
| 180 | 4J1F | 4.98 | 7.09 | 1.15 | 4.46 | 5.78 | 5.87 | 0.2 | 6.05 | 6.48 |
| 181 | 5YGY | 7.06 | 6.92 | 1.12 | 4.77 | 5.25 | 5.65 | 7.02 | 6.31 | 7.26 |
| 182 | 2HM1 | 1.55 | 3.86 | 0.86 | 1.04 | 3.64 | 4.35 | 0.99 | 2.31 | 3.66 |
| 183 | 3LPI | 0.92 | 5.9 | 0.34 | 0.64 | 6.12 | 4.48 | 1.63 |  | 6.94 |
| 184 | 4BFD | 4.15 | 6.96 | 0.12 | 4.16 | 5.37 | 4.32 | 0.22 | 5.05 | 2.97 |
| 185 | 3VG1 | 1.8 | 3.89 | 15.79 |  | 3.46 | 3.95 |  |  |  |
| 186 | 3CIB | 1.41 | 3.26 | 0.41 | 0.62 | 5.56 | 3.91 | 2.48 |  | 7.27 |
| 187 | 3N4L | 1.6 | 1.68 | 0.29 | 0.49 | 4.45 | 3.41 | 0.68 | 1.31 | 10.07 |
| 188 | 5QD0 | 9.07 | 0.87 | 0.21 | 0.72 | 5.86 | 3.23 | 0.41 | 2.48 | 5.75 |
| 189 | 6EJ3 | 0.74 | 0.55 | 0.13 | 0.49 | 1.53 | 0.46 | 0.53 | 2.72 | 9.81 |
| 190 | 6BFX | 0.9 | 1.28 | 0.09 | 0.33 | 3.05 | 3.37 | 0.22 | 3.29 | 2.46 |
| 191 | 5HE4 | 0.31 | 0.63 | 0.25 | 0.27 | 2.45 | 0.25 | 0.1 | 1.15 | 5.32 |
| 192 | 4X7I | 3.99 | 6.7 | 0.21 | 1.88 | 3.93 | 4.57 | 3.57 | 1.68 | 4.84 |
| 193 | 5HD0 | 2.43 | 0.89 | 0.16 | 0.81 | 4.48 | 1.01 | 0.56 |  | 6.79 |
| 194 | 2XFK | 9.31 | 9.29 | 0.27 | 5.66 | 5.06 | 4.66 | 0.3 | 2.26 | 8.65 |
| 195 | 4DI2 | 2.02 | 4.51 | 0.19 | 1.06 | 6.64 | 5.38 | 0.3 | 3.36 | 4.26 |
| 196 | 4I12 | 0.76 | 0.82 | 5 | 3.59 | 5.07 | 3.85 | 3.26 | 5.2 | 5.29 |
| 197 | 4I0Z | 0.83 | 0.6 | 4.38 | 1.35 | 3.84 | 2.98 | 6.62 | 4.38 | 5.95 |
| 198 | 5YGX | 5.49 | 7.1 | 0.51 | 4.31 | 5.82 | 6.02 | 0.5 | 6.4 | 5.7 |
| 199 | 3DUY | 1.29 | 2.87 | 0.19 | 1.13 | 5.25 | 3.77 | 0.69 | 3.92 | 7.09 |
| 200 | 4K9H | 1 | 1.97 | 0.19 | 1.09 | 4.42 | 3.85 | 0.4 | 5.14 | 6.12 |
| 201 | 3L3A | 2.35 | 1.33 | 3.34 | 1.18 | 1.33 | 1.85 | 1.27 | 2.73 | 6.92 |
| 202 | 5T1U | 2.11 | 4.29 | 0.79 | 1.65 | 3.22 | 5.07 | 0.27 | 2.09 | 6.94 |
| 203 | 4R95 | 4.72 | 4.64 | 0.28 | 1.41 | 3.91 | 2.8 | 0.53 | 2.24 | 7.91 |
| 204 | 3OHH | 1.53 | 5.33 | 0.43 | 1.38 | 5.49 | 4.07 | 6.57 | 1.36 | 7.76 |
| 205 | 3INF | 1.36 | 1.09 | 0.59 | 0.44 | 4.2 | 0.96 | 1.27 | 2.54 | 5.15 |
| 206 | 3PI5 | 0.84 | 1.13 | 0.76 | 0.71 | 3.74 | 3.3 | 0.33 | 3.92 | 3.34 |
| 207 | 3VEU | 9.49 | 6.45 | 0.7 | 1.09 | 5.17 | 4.04 | 0.48 | 2.66 | 5.36 |
| 208 | 7D2V | 5.72 | 4.3 | 0.41 | 5.16 | 6.44 | 3.61 | 0.26 | 6.71 | 6.04 |
| 209 | 4H3J | 2.05 | 0.91 | 0.24 | 0.44 | 1.25 | 1.17 | 0.14 |  | 3.33 |
| 210 | 3RTN | 1.78 | 1.84 | 0.55 | 1.62 | 4.36 | 3.88 | 3.5 | 1.07 | 13.41 |
| 211 | 3BUH | 1.68 | 4.59 | 1.35 | 1.83 | 4.4 | 1.66 | 1.04 | 1.7 | 14.7 |
| 212 | 5I3Y | 5.78 | 5.73 | 0.17 | 5.71 | 6.35 | 4.91 | 6.09 | 5.32 | 19.88 |
| 213 | 3TPP | 10.44 | 1.92 | 0.17 | 6.46 | 6.4 | 4.23 | 0.31 |  | 8.24 |
| 214 | 4B77 | 0.44 | 0.67 | 0.33 | 0.27 | 3.06 | 1.16 | 3.86 | 2.64 | 11.51 |
| 215 | 3UDH | 2 | 0.58 | 0.52 | 0.28 | 1.54 | 0.49 | 0.44 | 0.62 | 3.47 |
| 216 | 3VV6 | 3.34 | 3.36 | 3.42 | 1.23 | 1.86 | 2.58 | 2.03 | 1.89 | 6.16 |
| 217 | 5QCY | 1.2 | 6.91 | 0.28 | 1.36 | 6.57 | 4.25 | 0.42 |  | 9.84 |
| 218 | 4L7J | 1.1 | 4.04 | 0.45 | 1.52 | 3.14 | 1.34 | 4.06 | 2.68 | 6.29 |
| 219 | 4PZW | 1.21 | 0.52 | 0.76 | 1.38 | 1.48 | 0.46 | 1.36 | 3.71 | 6.22 |
| 220 | 3HW1 | 4.79 | 6.53 | 3.83 | 1.11 | 2.37 | 2.82 | 2.7 | 1.44 | 5.03 |
| 221 | 6NV9 | 0.81 | 1.46 | 16.08 | 0.72 | 2.25 | 3.24 | 0.57 | 10.09 | 3.81 |
| 222 | 5QCQ | 9.08 | 4.5 | 3.67 | 1.11 | 5.71 | 3.98 | 0.77 | 2.6 | 5.43 |
| 223 | 2IRZ | 7.1 | 7.28 | 0.14 | 6.18 | 8.3 | 4.71 | 0.2 | 5.4 | 5.41 |
| 224 | 4RRO | 3.47 | 0.52 | 0.25 | 0.46 | 4.56 | 0.34 | 4.14 | 3.96 | 6.05 |
| 225 | 3VV7 | 1.12 | 0.66 | 0.17 | 0.73 | 4.26 | 2.77 | 5.75 | 0.52 | 6.21 |
| 226 | 6JSN | 4.16 | 6.75 | 0.31 | 4.24 | 5.1 | 4.22 | 0.2 | 5.16 | 7.34 |
| 227 | 3INE | 1.71 | 0.93 | 1.3 | 1.15 | 2.02 | 0.95 | 0.88 | 4.14 | 3.88 |
| 228 | 4JOO | 1.82 | 5.58 | 0.28 | 0.28 | 3.32 | 0.37 | 0.16 | 1.01 | 6.29 |
| 229 | 3H0B | 5.3 | 6.87 | 0.25 | 0.37 | 3.31 | 1.34 | 0.27 | 5.18 | 3.52 |
| 230 | 4LXA | 1.03 | 4.22 | 0.45 | 0.54 | 7.37 | 3.66 | 0.35 | 3.56 | 4.68 |
| 231 | 3RSV | 1 | 1.34 | 3.61 | 1.44 | 5.41 | 3.73 | 2.62 | 2.73 | 5.54 |
| 232 | 7B1E | 7.18 | 6.34 | 6.16 | 5.06 | 5.19 | 4.15 | 5.2 | 4.29 | 4.89 |
| 233 | 2VIY | 7.77 | 8.47 | 0.3 | 1.18 | 6.29 | 5.03 | 0.57 | 6.17 | 6.55 |
| 234 | 4I0J | 0.74 | 1.52 | 0.2 | 0.59 | 4.47 | 3.8 | 0.42 | 2.37 | 6.58 |
| 235 | 5QCU | 0.72 | 1.05 | 0.43 | 0.66 | 2.75 | 2.35 | 0.25 | 11.48 | 3.48 |
| 236 | 2IS0 | 7.9 | 7.62 | 0.31 | 6.49 | 5.7 | 4.93 | 0.47 | 5.14 | 8.85 |
| 237 | 4R91 | 1.65 | 2.12 | 0.96 | 0.51 | 3.72 | 2.71 | 0.21 | 2.49 | 8.38 |
| 238 | 4JPC | 2.67 | 0.54 | 0.36 | 1.13 | 4.54 | 0.46 | 2.37 | 1.81 | 7.48 |
| 239 | 3UQW | 7.91 | 7 |  | 6.93 | 5.92 | 3.09 | 0.34 | 1.79 | 10.55 |
| 240 | 3CID | 6 | 2.64 | 0.22 | 0.64 | 3.55 | 4.42 | 1.39 |  | 8.5 |
| 241 | 3CKP | 1.21 | 2.96 | 0.36 | 0.57 | 5.05 | 2.63 | 2.79 | 2.22 | 6.99 |
| 242 | 4DJX | 1.29 | 0.55 | 5.38 | 1.1 | 4.93 | 0.51 | 0.98 | 2.41 | 3.82 |
| 243 | 4PZX | 3.92 | 0.87 | 0.36 | 0.46 | 3.68 | 0.97 | 1.24 | 2.4 | 2.02 |
| 244 | 3L5C | 3.27 | 2.69 | 2.34 | 1.71 | 2.75 | 2.46 | 3.52 | 2.81 | 6.75 |
| 245 | 5QCP | 1.06 | 1.17 | 0.07 | 0.44 | 2.56 | 2.32 | 0.46 |  | 6.93 |
| 246 | 2G94 | 3.03 | 9.96 | 0.3 | 1.33 | 6.14 | 4.94 | 7.3 | 2.73 | 5.79 |
| 247 | 6UVV | 3.7 | 0.66 | 5.19 | 1.24 | 3.11 | 1.55 | 4.5 | 2.81 | 5.28 |
| 248 | 2P8H | 9.42 | 9.51 | 0.27 | 7.81 | 5.9 | 5.8 | 0.31 |  | 5.47 |
| 249 | 4HZT | 0.46 | 1.05 | 0.39 | 0.64 | 4.8 | 2.73 | 4.37 | 3.12 | 3.25 |
| 250 | 3RTM | 2.32 | 4.34 | 3.94 | 2.98 | 3.51 | 3.33 | 2.27 | 2.74 | 6.4 |
| 251 | 4ZPE | 0.28 | 1.31 | 0.41 | 0.48 | 4.61 | 2.44 | 6.1 | 2.86 | 7.68 |
| 252 | 2QP8 | 8.33 | 8.25 | 0.24 | 0.82 | 6.01 | 2.95 | 0.24 |  | 7.22 |
| 253 | 4DPI | 9.5 | 2.69 |  |  | 6.18 | 3.56 |  |  |  |
| 254 | 4RRS | 0.59 | 0.9 | 2.44 | 0.35 | 1.68 | 0.84 | 3.88 | 1.29 | 6.95 |
| 255 | 2WF1 | 0.91 | 5.56 | 0.38 | 1.75 | 6.01 | 3.78 | 0.3 | 6.35 | 6.71 |
| 256 | 2QZK | 13.59 | 14.89 | 0.15 | 14.29 | 5.75 | 6 | 0.95 |  | 7.34 |
| 257 | 5QCR | 5.64 | 1.21 | 0.29 | 0.5 | 5.82 | 5.03 | 0.67 | 6.53 | 6.3 |
| 258 | 4I0D | 0.67 | 0.88 | 4.18 | 5.15 | 4 | 3.02 | 6.48 | 6.26 | 5.03 |
| 259 | 3ZMG | 5.27 | 7.44 | 0.41 | 5.73 | 4.91 | 5.43 | 0.45 | 7.8 | 5.34 |
| 260 | 3KN0 | 2.09 | 2.34 | 0.92 | 1.7 | 3.46 | 3.09 | 3.93 | 3.65 | 8.05 |
| 261 | 3LHG | 1.03 | 0.92 | 0.39 | 0.31 | 5.81 | 0.76 | 0.95 | 3.4 | 6.27 |
| 262 | 2VJ7 | 5.93 | 6.42 | 0.26 | 1.4 | 5.82 | 3.24 | 0.5 | 5.87 | 6.13 |
| 263 | 5QDC | 0.4 | 0.59 | 0.41 | 1.03 |  | 1.02 | 0.45 |  | 2.25 |
| 264 | 2QZL | 10.14 | 7.45 | 0.19 | 8.12 | 5.8 | 6.54 | 0.51 | 8.2 | 9.53 |
| 265 | 4FRI | 0.68 | 1.9 | 0.3 | 0.39 | 4.8 | 1.38 | 1.13 | 2.34 | 4.23 |
| 266 | 3RSX | 1.89 | 6.06 | 1.3 | 1.55 | 4.39 | 4.62 | 1.1 | 1.37 | 5.32 |
| 267 | 5QDD | 10.68 | 0.5 | 0.21 | 1.09 |  | 2.25 | 0.28 |  | 5.27 |
| 268 | 3CKR | 2.24 | 5.24 | 2.43 | 1.72 | 8.02 | 6.02 | 2.79 | 3.19 | 5.87 |
| 269 | 4FSL | 6.14 | 1.33 | 0.35 | 0.92 | 5.65 | 3.32 |  | 1.77 | 8.61 |
| 270 | 2WF4 | 6.62 | 1.87 | 0.22 | 0.44 | 3.7 | 4.35 | 0.29 | 5.56 | 4.38 |
| 271 | 5MCO | 7.11 | 6.68 | 0.12 | 6 | 5.24 | 4.74 | 0.2 | 7.03 | 7.63 |
| 272 | 5TOL | 5.98 | 6.6 | 3.76 | 3.88 |  | 4.28 | 0.76 |  | 4.79 |
| 273 | 6EQM | 7.11 | 6.47 | 0.42 | 7.46 |  | 4.55 | 0.2 | 4.67 | 4.44 |
| 274 | 4FRK | 0.86 | 1.34 | 0.26 | 0.92 | 1.16 | 1.25 | 0.65 | 2.24 | 9.3 |
| 275 | 2VKM | 7.54 | 7.08 | 0.47 | 2.35 | 4.69 | 3.81 | 1.3 | 5.89 | 6.43 |
| 276 | 3SKF | 2.75 | 10.91 | 0.36 | 1.95 | 6.98 | 4.88 | 1.4 |  | 6.84 |
| 277 | 4J1E | 5.73 | 7.48 | 0.21 | 4.67 | 4.85 | 5.55 | 0.13 | 4.6 | 7.34 |
| 278 | 4RRN | 0.69 | 0.77 | 0.92 | 0.38 | 2.28 | 0.54 | 1.59 | 1.8 | 7.91 |
| 279 | 2QMG | 1.42 | 5.03 | 0.2 | 0.56 | 5.89 | 4.12 | 0.3 |  | 7.21 |
| 280 | 2B8V | 5.33 | 5.61 | 0.28 | 0.6 | 6.94 | 3.42 | 0.54 |  | 6.78 |
| 281 | 2OHT | 3.83 | 4.34 | 3.5 | 3.71 | 3.15 | 4.95 | 4.22 | 2.52 | 4.42 |
| 282 | 4I0G | 0.73 | 1.65 | 0.21 | 1.46 | 3.67 | 3.2 | 0.18 | 3.35 | 5.2 |
| 283 | 7MYU | 3.07 | 5.79 | 0.46 | 4.05 |  | 4.39 | 0.13 | 3.46 | 6.68 |
| 284 | 4RCE | 1.54 | 1.47 | 0.27 | 1.04 | 1.41 | 1.12 | 0.44 | 0.61 | 5.81 |
| 285 | 2QK5 | 1.28 | 7.53 | 4.23 | 1.77 | 5.96 | 4.1 | 1.3 | 2.05 | 9.21 |
| 286 | 6E3Z | 4.73 | 6.38 | 1.71 | 3.84 |  | 4.76 | 0.3 | 2.41 | 6.5 |
| 287 | 3BUG | 0.73 | 2.88 | 2.09 | 0.5 | 4.74 | 1.33 | 0.85 | 1.49 | 14.65 |
| 288 | 5QD9 | 1.01 | 0.6 | 0.74 | 0.57 |  | 3.18 | 0.55 | 4.38 | 5.57 |
| 289 | 5QCO | 9.37 | 0.66 | 6.54 | 0.94 |  | 2.97 | 0.61 |  | 8.93 |
| 290 | 3WB5 | 3.25 | 2.74 | 2.06 | 0.89 | 3.75 | 1.18 | 2.69 | 2.28 | 6.34 |
| 291 | 2ZJH | 2.23 | 7.95 | 0.46 | 1.92 | 3.87 | 2.23 | 1.24 | 1.65 | 8.73 |
| 292 | 2OAH | 4.85 | 4.88 | 1.09 | 0.53 | 7.08 | 2.67 | 0.48 | 4.77 | 7.79 |
| 293 | 4JP9 | 2.56 | 0.69 | 0.16 | 0.3 | 4.4 | 0.14 | 1.28 | 2.2 | 5.75 |
| 294 | 2VIE | 1.59 | 5.96 | 0.19 | 1.21 | 5.7 | 4.71 | 0.34 | 6.47 | 9.16 |
| 295 | 6NV7 | 0.93 | 1.43 | 0.18 | 0.87 |  | 3.11 | 0.81 | 9.98 | 6.01 |
| 296 | 4R5N | 4.97 | 0.75 | 0.22 | 3.85 | 2.24 | 4.21 | 2.7 | 0.99 | 6.12 |
| 297 | 5QD2 | 0.92 | 0.87 | 0.13 | 0.33 |  | 3.25 | 0.35 |  | 4.04 |
| 298 | 3ZOV | 5.95 | 7.22 | 0.67 | 7.42 | 6.68 | 4.71 | 1.05 | 6.75 | 4.43 |
| 299 | 3IND | 1.39 | 1.24 | 3.58 | 0.75 | 1.25 | 1.02 | 0.94 | 0.94 | 5.92 |
| 300 | 4J1I | 5.43 | 7.09 | 0.17 | 6.38 | 6.06 | 4.84 | 0.3 | 5.26 | 3.97 |
| 301 | 1XS7 | 6.07 | 3.38 |  | 4.3 | 4.7 | 4.13 | 4.14 |  | 5.99 |
| 302 | 3UDY | 2.02 | 0.51 | 0.35 | 0.36 | 4.53 | 2.17 | 0.34 | 2.42 | 6.28 |
| 303 | 5T1W | 4.23 | 3.64 | 0.33 | 1.75 |  | 3.36 | 4.89 | 1.91 | 7.1 |
| 304 | 6NW3 | 10.88 | 1.46 | 0.1 | 0.34 |  | 1.91 | 0.46 | 11.14 | 2.85 |
| 305 | 5QD6 | 0.94 | 0.89 | 0.18 | 0.48 |  | 5 | 0.4 | 1.74 | 6.46 |
| 306 | 3EXO | 3.26 | 1.31 | 1.28 | 6.67 | 4.84 | 1.13 | 7.21 | 7.7 | 6.39 |
| 307 | 6JT3 | 5.68 | 6.45 | 2.93 | 5.43 |  | 4.88 | 0.29 | 6.18 | 6.41 |
| 308 | 4DJU | 4.13 | 1.35 | 0.62 | 0.48 | 2.55 | 1.27 | 0.5 | 0.88 | 6.28 |
| 309 | 4J0Y | 5.48 | 7.54 | 0.42 | 4.95 | 5.38 | 4.45 | 0.23 | 7.56 | 6.1 |
| 310 | 3UDP | 0.5 | 0.51 | 0.15 | 0.29 | 1.77 | 2.02 | 0.19 | 4.03 | 7.8 |
| 311 | 3K5F | 6.09 | 6.55 | 0.3 | 0.63 | 5.33 | 4.16 | 0.31 | 2.55 | 8.25 |
| 312 | 4XXS | 1.45 | 7.18 | 0.41 | 1.33 | 0.7 | 1.18 | 1.35 | 2.46 | 7.71 |
| 313 | 3CIC | 0.57 | 6.93 | 8.72 | 0.53 | 4.61 | 4.48 | 2.71 |  | 9.14 |
| 314 | 4J0V | 5.58 | 7.85 | 0.13 | 5.87 | 6.39 | 4.75 | 0.34 | 6.13 | 4.6 |
| 315 | 3QBH | 5.27 | 4.19 | 0.29 | 0.55 | 3.76 | 3.92 | 0.4 | 5.82 | 5.79 |
| 316 | 4ZSM | 2.88 | 7.88 | 1 | 0.55 | 2.42 | 3.75 | 2.38 | 1.64 | 4.41 |
| 317 | 3UDJ | 2.4 | 0.39 | 0.12 | 0.98 | 2.04 | 1.59 | 0.16 | 1.36 | 4.15 |
| 318 | 5QDB | 1.02 | 0.73 | 0.19 | 0.53 |  | 2.48 | 0.52 | 9.32 | 4.89 |
| 319 | 5F00 | 4.78 | 6.24 | 5.29 | 3.35 | 4.76 | 2.22 | 5.76 | 3.92 | 6.8 |
| 320 | 2IQG | 1.63 | 6.09 | 0.21 | 1.63 | 6.06 | 4.06 | 2.62 | 6.47 | 8.3 |
| 321 | 3RU1 | 4.72 | 4.03 | 4.59 |  | 2.23 | 4.28 |  |  |  |
| 322 | 2PH6 | 7.87 | 7.99 | 0.4 | 6.2 | 6.15 | 4.93 | 0.33 | 6.78 | 6.21 |
| 323 | 4I0H | 1.41 | 4.21 | 0.25 | 1.09 | 4.46 | 2.92 | 0.43 |  | 9.68 |
| 324 | 4WTU | 0.36 | 0.57 | 0.67 | 0.31 | 1.83 | 1.07 | 1.12 | 1.69 | 8.78 |
| 325 | 4D88 | 1.05 | 2.61 | 0.26 | 0.82 | 4.71 | 4.16 | 0.24 | 2.58 | 9.54 |
| 326 | 6BFE | 1 | 1.79 | 0.28 | 0.59 |  | 4.75 | 0.16 | 1.7 | 8.4 |
| 327 | 3L5D | 4.68 | 4.86 | 3.66 | 3.74 | 3.19 | 1.66 | 6.79 | 4.61 | 4.44 |
| 328 | 3UDR | 2.09 | 0.47 | 6.12 | 0.36 | 2.82 | 1.71 | 6.22 | 2.74 | 3.91 |
| 329 | 4KE1 | 0.99 | 0.51 | 0.25 | 0.38 | 1.76 | 3.96 | 0.23 |  | 5.69 |
| 330 | 3IN4 | 0.6 | 2.36 | 4.12 | 0.51 | 2.67 | 0.98 | 0.44 | 2.95 | 2.36 |
| 331 | 3K5G | 5.4 | 3.27 | 0.51 | 0.57 | 3.86 | 3.63 | 1.62 | 5.1 | 5.3 |
| 332 | 4R8Y | 1.79 | 1.88 | 0.33 | 1.6 | 2.32 | 2.34 | 2.63 | 1.62 | 6.97 |
| 333 | 4H3G | 3.27 | 0.53 | 1.07 | 3.53 | 3.83 | 0.56 | 0.21 |  | 8.17 |
| 334 | 3I25 | 7.75 | 10.08 |  | 4.75 | 4.9 |  | 0.63 | 7.49 |  |
| 335 | 3S2O | 3.05 | 1.02 | 0.85 | 3.65 | 2.01 | 1.28 | 2.42 | 0.92 | 4.69 |
| 336 | 3SKG | 2.19 | 2.49 | 0.19 | 3.42 | 3.99 | 4.17 | 0.7 | 2.04 | 3.95 |
| 337 | 4FRS | 5.09 | 0.18 | 0.31 | 0.25 | 6.96 | 2.14 | 0.14 | 6.95 | 7.94 |
| 338 | 3KMX | 1.47 | 1.1 | 0.41 | 1.17 | 3.22 | 1.18 | 1.45 | 1.7 | 7.32 |
| 339 | 5EZZ | 0.98 | 3.3 | 0.86 | 1.84 | 5.26 | 3.52 | 3.92 | 1.61 | 7.81 |
| 340 | 4ZSP | 3.55 | 0.56 | 0.6 | 3.76 | 4.26 | 3.22 | 0.47 | 1.59 | 3.81 |
| 341 | 2P4J | 6.59 | 8.07 | 13.85 | 6.6 | 5.67 | 5.38 | 5.53 | 4.04 | 4.78 |
| 342 | 7D36 | 5.05 | 6.72 | 5.76 | 4.51 |  | 5.94 | 4.97 |  | 6.19 |
| 343 | 6UWP | 1.77 | 1.13 | 0.29 | 0.47 |  | 1.47 | 0.47 | 4.5 | 8.07 |
| 344 | 3L5E | 2.94 | 2.3 | 0.8 | 1.25 | 3.06 | 4.6 | 5.28 | 2.41 | 5.28 |
| 345 | 3UDN | 2.06 | 0.33 | 0.57 | 0.23 | 4.53 | 2.95 | 0.47 | 1.43 | 6.31 |
| 346 | 2VIJ | 8.84 | 5.44 |  |  | 4.97 | 3.53 |  |  |  |
| 347 | 4I0F | 0.39 | 2.99 | 4.68 | 2.54 | 2.72 | 3.05 | 8.28 | 4.66 | 2.95 |
| 348 | 3LPJ | 7.98 | 3.35 | 7.43 | 0.55 | 6.08 | 3.98 | 1.67 |  | 8.85 |
| 349 | 3QI1 | 1.2 | 2.4 | 0.23 | 0.77 | 5.7 | 2.66 | 0.29 |  | 5.11 |
| 350 | 5HDX | 2.65 | 2.81 | 0.29 | 0.45 | 1.48 | 0.8 | 0.34 |  | 4.64 |
| 351 | 3RTH | 1.83 | 4.67 | 0.35 | 1.1 | 4.23 | 3.69 | 1.38 | 1.62 | 6.12 |
| 352 | 5ENK | 0.49 | 0.65 | 0.23 | 0.38 | 4 | 2.22 | 0.5 | 2.64 | 6.25 |
| 353 | 4DJW | 5.24 | 0.71 | 4.76 | 0.85 | 5.05 | 0.78 | 6.79 | 2.22 | 5.93 |
| 354 | 5QCS | 3.84 | 2.92 | 0.22 | 0.64 |  | 2.62 | 0.37 | 3.15 | 2.54 |
| 355 | 4RCD | 0.46 | 0.44 | 8.27 | 0.94 | 2.2 | 1.69 | 5.56 | 1.65 | 6.11 |
| 356 | 4J0Z | 5.94 | 7.38 | 0.37 | 6.48 | 6.28 | 4.46 | 0.74 | 6.59 | 5.02 |
| 357 | 2OHL | 4.05 | 6.07 | 2.52 | 1.8 | 3.69 | 1.19 | 5.22 | 1.97 | 7.4 |
| 358 | 3L59 | 2.67 | 2.95 | 0.8 | 0.75 | 2.76 | 1.19 | 0.86 | 1.47 | 8.46 |
| 359 | 2ZJJ | 2.74 | 3.95 | 5.77 | 2.48 | 5.04 | 2.03 | 1.87 | 4.71 | 6.05 |
| 360 | 3RVI | 0.65 | 0.92 | 0.61 | 1.07 | 3.87 | 3.55 | 4.11 | 2.96 | 5.04 |
| 361 | 2ZJI | 4.19 | 2.81 | 2 | 1.79 | 1.73 | 2.21 | 1.34 | 2.59 | 6.69 |
| 362 | 3WB4 | 2.06 | 3.01 | 0.46 | 0.85 | 4.67 | 0.91 | 0.54 | 1.46 | 6.34 |
| 363 | 2Q11 | 5.18 | 4.21 | 3.91 | 5.5 | 4.99 | 4.78 | 3.91 | 4.48 | 4.04 |
| 364 | 4N00 | 4.16 | 5.59 | 0.54 | 0.99 | 2.19 | 0.81 | 6.67 | 1.02 | 6.48 |
| 365 | 6UWV | 1.87 | 2.06 | 0.62 | 1.4 |  | 2.2 | 1 | 3.74 | 7.85 |
| 366 | 6DHC | 5 | 8.02 | 0.45 | 2.06 |  | 4.18 | 5.84 | 4.72 | 8.86 |
| 367 | 3MSL | 3.95 | 4.47 | 3.35 | 3.49 | 2.05 | 1.32 | 3.08 | 4.05 | 5.39 |
| 368 | 2QU2 | 0.99 | 1.91 | 0.66 | 0.77 | 2.03 | 1.59 | 1.16 | 0.79 | 7.45 |
| 369 | 4I0E | 3.08 | 0.83 | 0.62 | 4.26 | 4.13 | 3.04 | 2.84 | 4.72 | 4.01 |
| 370 | 5QD4 | 10.97 | 6.57 | 0.22 | 10.09 |  | 3.14 | 25.06 |  | 5.53 |
| 371 | 4WY6 | 0.76 | 0.76 | 0.35 | 0.56 | 0.68 | 0.89 | 0.16 | 1.74 | 5.22 |
| 372 | 2F3E | 11.38 | 5.83 | 0.21 | 6.36 | 6.21 | 3.76 | 7.83 |  | 2.83 |
| 373 | 5UYU | 1.82 | 0.56 | 0.34 | 1.94 |  | 2.46 | 0.53 |  | 7.42 |
| 374 | 6DMI | 2.33 | 3.01 |  |  |  | 2.47 |  |  |  |
| 375 | 7F1D | 5.95 | 7.29 | 0.18 | 6.63 |  | 4.87 | 0.32 | 7.24 | 5.6 |
| 376 | 7N66 | 5.79 | 6.93 | 0.16 | 6.12 |  | 4.2 | 0.75 | 6.89 | 4.18 |
| 377 | 3IGB | 1.75 | 1.58 | 1.89 | 0.56 | 2.24 | 1.25 | 0.5 | 1.06 | 7.23 |
| 378 | 5QDA | 1.18 | 0.76 | 0.19 | 1.26 |  | 1.3 | 0.55 |  | 4.95 |
| 379 | 2OHM | 1.99 | 2.5 | 0.65 | 1.23 | 3.67 | 2.6 | 3.61 | 2.09 | 5.41 |
| 380 | 6WNY | 5.58 | 5.49 | 0.2 | 5.41 |  | 3.92 | 0.38 | 5.07 | 9 |
| 381 | 3MSK | 3.18 | 3.78 | 1.26 | 2.52 | 3.18 | 2.62 | 2.99 | 3.43 | 5.28 |
| 382 | 4DJY | 1.05 | 2.15 | 1.13 | 0.83 | 5.29 | 0.27 | 0.84 | 3.52 | 6.02 |
| 383 | 3U6A | 5.62 | 5.16 | 0.45 | 4.09 | 5.18 | 5.53 | 1.22 | 3.39 | 3.9 |
| 384 | 3VF3 | 0.91 | 1.16 | 0.36 | 0.46 | 3.6 | 3.6 | 0.32 | 3.58 | 6.87 |
| 385 | 6JSG | 6.06 | 6.7 | 0.5 | 5.75 |  | 5.04 | 0.31 | 6.29 | 4.43 |
| 386 | 3L38 | 1.58 | 1.31 | 0.29 | 0.75 | 1.49 | 1.91 | 1.35 | 1.88 | 6.29 |
| 387 | 2ZJL | 1.36 | 1.21 | 0.47 | 1.56 | 2.68 | 3.6 | 0.86 | 1.98 | 4.31 |
| 388 | 2VJ9 | 5.75 | 2.75 | 0.16 | 0.72 | 6.95 | 3.5 | 0.2 | 5.63 | 11.34 |
| 389 | 5QCZ | 0.64 | 0.57 | 0.23 | 0.63 |  | 3.42 | 0.13 |  | 6.04 |
| 390 | 2WF2 | 1.1 | 5.95 | 0.35 | 1.74 | 5 | 3.28 | 0.36 | 4.8 | 4.18 |
| 391 | 5F01 | 5.12 | 1.13 | 1.14 | 3.28 | 5.84 | 3.33 | 0.49 |  | 6.68 |
| 392 | 4B0Q | 0.49 | 0.67 | 0.38 | 2.21 | 4.74 | 1.65 | 1.03 |  | 12.16 |
| 393 | 4ACU | 0.89 | 0.59 | 0.21 | 0.39 | 5.22 | 0.45 | 0.6 |  | 6.66 |
| 394 | 4B05 | 0.72 | 6.36 | 7.78 | 0.4 | 3.91 | 0.84 | 6.47 |  | 3.79 |
| 395 | 4GMI | 1.34 | 0.57 |  |  | 2.26 | 1.9 |  |  |  |
| 396 | 4GID | 7.13 | 3.48 | 0.18 |  | 5.77 | 4.7 | 0.77 |  |  |
| 397 | 4ACX | 0.71 | 0.55 | 0.45 | 0.42 | 2.05 | 1.02 | 0.5 |  | 5.63 |
| 398 | 4B00 | 1.96 | 1.84 | 0.32 | 0.52 | 4.98 | 2.6 | 0.2 |  | 7.98 |
| 399 | 5HU1 | 4.41 | 0.42 | 0.14 | 4.31 | 5.64 | 3.53 | 0.3 | 4.39 | 6.83 |
| 400 | 4B1D | 0.67 | 1.71 | 0.38 | 0.36 | 3.22 | 0.75 |  |  | 5.9 |
| 401 | 4AZY | 0.74 | 6.45 | 1.31 | 0.25 | 5.59 | 2.88 | 2.6 |  | 6.05 |

*All receptors and ligands were prepared using the same automated pipeline, and the docking protocols were applied uniformly across all PDB complexes. However, certain docking runs failed to produce results, even though no differences existed in input formatting or command structures.*

*The failures were accompanied by errors such as:*

- *"Too many positional options have been specified"*
- *"terminate called after throwing an instance of 'std::runtime_error'"*
- *Or abrupt termination without clear diagnostic messages*

*These issues appear to arise from tool-specific limitations in command-line parsing, input handling, or runtime stability, particularly under high-throughput, scripted conditions.
Importantly, these failures were not due to user-side or scripting errors, but likely reflect:*

- *Inflexible input validation in certain docking tools*
- *Or inadequate error handling for auto-generated input files*

**Table S3: Percentage of Poses with RMSD < 4 Å (Least Energy & Least RMSD Pose)**

| **Docking Method** | **% Poses with RMSD < 4 Å (Least Energy)** | **% Poses with RMSD < 4 Å (Least RMSD)** |
| --- | --- | --- |
| AutoDock Vina Rigid | 44.03 | 65.67 |
| AutoDock Rigid | 38.56 | 59.95 |
| DOCK 6 Rigid | 79.74 | 88.21 |
| GNINA Rigid | 65.81 | 80.21 |
| AutoDock Vina Flexible | 7.71 | 39.05 |
| AutoDock Flexible | 26.62 | 70.15 |
| DOCK 6 Flexible | 74.35 | 87.31 |
| GNINA Flexible | 27.88 | 61.54 |
| DiffDock | 0.0 | 11.41 |

**References**

1 Bell, E. W., & Zhang, Y. (2019). DockRMSD: an open-source tool for atom mapping and RMSD calculation of symmetric molecules through graph isomorphism. *Journal of Cheminformatics*, *11*(1). https://doi.org/10.1186/s13321-019-0362-7
